1

2

3 **Stimulus-specific neural encoding of a persistent, internal defensive state in the hypothalamus**

4

5 Ann Kennedy<sup>1\*</sup>, Prabhat S. Kunwar<sup>1\*†</sup>, Lingyun Li<sup>1</sup>, Daniel Wagenaar<sup>1</sup>, and David J. Anderson<sup>1,2,3</sup>

6

7 <sup>1</sup>Division of Biology and Biological Engineering 156-29, Tianqiao and Chrissy Chen Institute for  
8 Neuroscience, California Institute of Technology, Pasadena, California 91125, USA

9 <sup>2</sup>Howard Hughes Medical Institute, California Institute of Technology, 1200 East California Blvd,  
10 Pasadena, California 91125 USA

11 <sup>3</sup>Author for correspondence

12 \*These authors contributed equally to this work.

13 †Present address: Biogen, 225 Binney St. Cambridge, MA 02142 USA

## 14 Summary

15 Persistent neural activity has been described in cortical, hippocampal, and motor networks as  
16 mediating short-term working memory of transiently encountered stimuli<sup>1-4</sup>. Internal emotion states  
17 such as fear also exhibit persistence following exposure to an inciting stimulus<sup>5,6</sup>, but such  
18 persistence is typically attributed to circulating stress hormones<sup>7-9</sup>; whether persistent neural activity  
19 also plays a role has not been established. SF1<sup>+</sup>/Nr5a1<sup>+</sup> neurons in the dorsomedial and central  
20 subdivision of the ventromedial hypothalamus (VMHdm/c) are necessary for innate and learned  
21 defensive responses to predators<sup>10-13</sup>. Optogenetic activation of VMHdm<sup>SF1</sup> neurons elicits defensive  
22 behaviors that can outlast stimulation<sup>11,14</sup>, suggesting it induces a persistent internal state of fear or  
23 anxiety. Here we show that VMHdm<sup>SF1</sup> neurons exhibit persistent activity lasting tens of seconds, in  
24 response to naturalistic threatening stimuli. This persistent activity was correlated with, and  
25 required for, persistent thigmotaxic (anxiety-like) behavior in an open-field assay. Microendoscopic  
26 imaging of VMHdm<sup>SF1</sup> neurons revealed that persistence reflects dynamic temporal changes in  
27 population activity, rather than simply synchronous, slow decay of simultaneously activated  
28 neurons. Unexpectedly, distinct but overlapping VMHdm<sup>SF1</sup> subpopulations were persistently  
29 activated by different classes of threatening stimuli. Computational modeling suggested that  
30 recurrent neural networks (RNNs) incorporating slow excitation and a modest degree of  
31 neurochemical or spatial bias can account for persistent activity that maintains stimulus identity,  
32 without invoking genetically determined “labeled lines”<sup>15</sup>. Our results provide causal evidence that  
33 persistent neural activity, in addition to well-established neuroendocrine mechanisms, can  
34 contribute to the ability of emotion states to outlast their inciting stimuli, and suggest a mechanism

35 **that could prevent over-generalization of defensive responses without the need to evolve hardwired**  
36 **circuits specific for each type of threat. (267 words)**

37 **Main Text**

38 We performed fiber photometry<sup>16</sup> in VMHdm<sup>SF1</sup> neurons expressing GCaMP6s<sup>17</sup> in freely behaving mice  
39 during a 10s presentation of a predator (an anesthetized rat<sup>18</sup>) (**Fig. 1a-c**). We observed a rapid  
40 increase in the bulk calcium signal at the onset of rat presentation (**Fig. 1d, e**). Remarkably, this activity  
41 persisted for over a minute following rat removal, decaying exponentially with time constant  $\tau_{\text{decay}} =$   
42  $26.7 \pm 2.2$  seconds (**Fig. 1d-e, h-i; Supplemental Video 1**). In contrast, a toy rat presented in the same  
43 manner produced a far weaker and less persistent response (**Fig. 1d, e**).

44 To better control the timing and location of stimulus presentation, we repeated this experiment  
45 using a head-fixed preparation. The magnitude, decay constants and specificity of VMHdm<sup>SF1</sup> persistent  
46 responses were comparable to those measured in freely behaving mice (**Fig. 1f-i; Extended Data. 1**). As  
47 discussed below, this persistence is unlikely to be due simply to slow GCaMP decay kinetics (**Fig. 2 and**  
48 **Extended Data Fig. 5**). VMHdm<sup>SF1</sup> neurons also responded to rat urine alone (**Extended Data Fig. 2**),  
49 consistent with earlier studies<sup>19,20</sup>.

50 To investigate whether VMHdm<sup>SF1</sup> neurons were also active during persistent defensive  
51 behaviors, we devised a novel rat exposure assay in an open arena. Following a ten-minute period of  
52 habituation to the arena by the mouse, an awake rat in a cage was presented to the mouse for 15  
53 seconds, and then removed. After rat exposure, mice exhibited thigmotaxis, an indication of increased  
54 anxiety<sup>21</sup>, lasting for minutes (**Fig. 1l, m; control; blue line**). Thigmotaxis was not observed if the mouse  
55 was introduced to the arena following, rather than before, rat presentation, indicating that it is unlikely

56 to be due to residual rat-derived odors (**Extended Data Fig. 3a-c**). Persistent thigmotaxis could also be  
57 evoked by brief optogenetic stimulation of VMHdm<sup>SF1</sup> neurons (ref <sup>11</sup> and **Extended Data Fig. 3d, e**)).  
58 Fiber photometry confirmed that VMHdm<sup>SF1</sup> neurons were strongly and persistently activated for  
59 minutes following rat presentation in the arena (**Extended Data Fig. 4c-e**), with kinetics well correlated  
60 with behavior (**Extended Data Fig. 4f-i**).

61 We next tested a requirement for VMHdm<sup>SF1</sup> neurons in the rat-evoked increase in thigmotactic  
62 behavior, using the light-gated chloride channel iC++<sup>22</sup> to reversibly silence these cells. First, we  
63 confirmed that iC++ inhibition of VMHdm<sup>SF1</sup> neurons in a home cage rat exposure assay increased the  
64 time the mice spent in close proximity to the rat (**Fig. 1j, k**), phenocopying genetic ablation of these  
65 neurons<sup>11</sup>. Next, we repeated the open field rat exposure test while photo-inhibiting VMHdm<sup>SF1</sup>  
66 neurons continuously for a 3 min period, either starting five seconds prior to rat introduction, or  
67 immediately following rat removal (**Fig. 1m**; “light on,” red vs. green bars, respectively).

68 When silencing was initiated five seconds prior to rat introduction, no significant rat-induced  
69 increase in thigmotaxis was observed (**Fig. 1m-o**; red plots). Importantly, when iC++ photostimulation  
70 was initiated only after rat removal, mice showed an initial increase in thigmotaxis, but quickly  
71 returned to their pre-rat baseline behavior (**Fig. 1m-o, green plots; Extended Data Fig. 4a**). These data  
72 indicate that VMHdm<sup>SF1</sup> neuronal activity is essential for maintaining a persistent defensive behavioral  
73 response to a predator.

74 To investigate the neural dynamics underlying the rat-evoked persistent state, we next  
75 performed microendoscopic imaging<sup>23,24</sup> of VMHdm<sup>SF1</sup> neurons (**Fig. 2a-b**). Head-fixed mice were  
76 presented for ten seconds each with a pseudorandomized set of stimuli including a rat, toy rat, and

77 conspecific male, on each of three days of imaging (n=5 mice,  $187.3 \pm 8.1$  cells imaged per day, 78 cells  
78 tracked across days.) While VMHdm<sup>SF1</sup> neurons, as a population, showed persistent activation  
79 following rat presentation (**Fig. 2c-d**), individual VMHdm<sup>SF1</sup> neurons showed diverse but reproducible  
80 stimulus-evoked dynamics (**Fig. 2e-g**). Although many cells showed activation from stimulus onset  
81 followed by slow decay, other cells reached their peak activation only after stimulus removal. Thus the  
82 slow, monotonic decay of the population response reflects a diverse, time-evolving pattern of activity  
83 at the level of individual cells (**Fig. 2j-p**). Application of a spike-deconvolution algorithm<sup>25</sup> indicated that  
84 the persistent  $\Delta F/F$  signal likely reflects persistent underlying spiking activity (**Extended Data Fig. 5**).  
85 Strikingly, the rat and conspecific activated distinct subpopulations of VMHdm<sup>SF1</sup> neurons with only  
86 moderate overlap (**Fig. 2h, i**).

87 In rodents, nonvolatile odor cues can activate neurons of the vomeronasal organ (VNO) for  
88 several seconds following inhalation<sup>26</sup>. It was therefore possible that the persistent activity we  
89 observed in VMHdm<sup>SF1</sup> neurons reflected persistence of the stimulus signal. If this were the case, we  
90 would expect VMHdm<sup>SF1</sup> neurons to show only transient responses to time-resolved stimuli, such as  
91 purely visual or auditory stimuli. VMHdm neurons are not activated by (**Extended Data Fig. 6**), or  
92 required for<sup>11</sup> defensive responses to, an overhead visual threat stimulus<sup>27</sup>, and have not previously  
93 been shown to respond to auditory stimuli. We therefore imaged VMHdm<sup>SF1</sup> neuron activity in  
94 response to an auditory stimulus that evokes defensive behaviors in mice<sup>28,29</sup>: a series of ultrasonic  
95 sweeps (USS) in the frequency range typical of rat distress vocalizations<sup>30</sup> (Methods).

96 The USS strongly activated VMHdm<sup>SF1</sup> neurons, and this activation persisted on a similar time  
97 scale as that following rat exposure, after stimulus termination (**Fig. 3a-b**). Underlying this population  
98 response, individual USS-responsive VMHdm<sup>SF1</sup> neurons showed diverse dynamics, as was observed for

99 the rat and mouse stimuli (**Fig. 3c-f**). The USS activated VMHdm<sup>SF1</sup> neurons were spatially intermingled  
100 with the rat (and mouse) -responsive populations, and overlapped them at a frequency equal to that  
101 expected by chance (**Fig. 3g-j; Extended Data Fig. 7**). This suggests that these populations are randomly  
102 distributed, but reproducibly activated by a given stimulus. Of the neurons showing a significant  
103 response to at least one of our five test stimuli (74.4%), 43.6% responded to only one stimulus, and  
104 over 70% of cells responded to  $\leq 2$  of the five tested stimuli (**Fig. 3k**). Most stimulus-responsive  
105 VMHdm<sup>SF1</sup> neurons were excited, although a small number showed stimulus-evoked inhibition (**Fig. 3c-**  
106 **f, l**). Principal component analysis (PCA) indicated that in addition to stimulus identity, VMHdm<sup>SF1</sup>  
107 neurons may encode an additional feature common to multiple stimuli (**Fig. 3o**, y-axis). Since this  
108 feature has higher values on initial vs. later trials, it may relate to novelty or salience. A 5-way Naïve  
109 Bayes decoder was able to predict stimulus identity in held-out trials across three days of imaging with  
110 above-chance accuracy (**Fig. 3m**). Importantly, despite the gradual decay in population activity  
111 following stimulus offset, stimulus identity could still be decoded with above chance accuracy for tens  
112 of seconds (**Fig. 3n, Extended Data Fig. 8**). Thus, the VMHdm<sup>SF1</sup> population response can encode the  
113 identity of the presented stimulus, even after its removal.

114 We next used computational modeling to investigate the space of mechanisms that can  
115 account for persistent activity in VMHdm<sup>SF1</sup> neurons, incorporating features that have been proposed  
116 in other systems<sup>2,3,31-36</sup>. We evaluated four classes of models (**Fig 4a1-4**) in terms of their ability to  
117 capture two main features of VMHdm<sup>SF1</sup> neural activity: it changes over time, and it is stimulus-  
118 specific. To achieve persistent activity with time-evolving dynamics that aligned with our experimental  
119 observations, it was necessary to combine two elements: inhibition-stabilized recurrent connectivity  
120 and slow excitation on a time scale of several seconds (mediated by, e.g., peptidergic transmission<sup>37</sup>);

121 we call the resulting class of models peptidergic recurrent neural networks (pRNNs) (**Fig. 4a3**). The  
122 importance of feedback inhibition in our model suggests the existence of an inhibitory population that  
123 is activated by threatening stimuli; a likely candidate are GABAergic neurons in the surrounding  
124 DMH<sup>38,39</sup>.

125 To compare the time-evolving population code of VMHdm<sup>SF1</sup> neurons (**Fig4b**) with the dynamics  
126 of these models, we computed the autocorrelation matrix of stimulus-evoked activity for all values of  $t$   
127 and  $t'$  between 0 and 45 s after stimulus onset(**Fig 4c**), and summarized it by computing the mean  
128 correlation over all neurons as a function of  $\Delta t$  ( $t - t'$ ) (**Fig 4d**). Several versions of our pRNN models  
129 showed autocorrelation dynamics similar to observed dynamics (**Fig 4e**). Importantly, models that used  
130 slow peptidergic transmission alone (**Fig 4a1**), or RNNs with NMDA-mediated transmission<sup>40</sup> (**Fig 4a2**)  
131 could not match the diverse responses we observed in VMHdm<sup>SF1</sup> neurons (**Fig. 4e1-2**).

132 The stimulus specificity of VMHdm<sup>SF1</sup> responses (**Fig 4f**) was quantified as the time-evolving  
133 Pearson's correlation between rat- vs. USS-evoked activity (**Fig 4g**). Maintaining stimulus specific  
134 representations during persistence could only be achieved in the pRNN by increasing the gain  
135 (strength) of excitatory synapses<sup>41,42</sup> (**Fig. 4a3, h3-4**), but this came at the cost of failing to match the  
136 autocorrelation dynamics of observed activity (**Fig e3-4**). However, both main features of the data  
137 could be matched if the synaptic time constant of peptidergic excitation was further increased from 6  
138 to 20 seconds (**Fig 4a3,h5,e5**). Alternatively, both features could be matched by assuming that the  
139 probability of synapse formation between a pair of model neurons decreased slightly with the distance  
140 between them, and imposing a mild differential spatial bias on the responses to different stimuli (rat  
141 vs. USS) (**Fig 4a4,h6,e6, ED Fig 9**). Imposing further network structure produced too much segregation  
142 between stimulus representations, compared to the overlap observed (**ED Fig 9**). We summarized the

143 performance of our models by creating a pair of “data similarity scores” quantifying model similarity to  
144 data in terms of time-evolving dynamics and stimulus specificity (**Fig 4i-k**).

145 Persistent defensive states are typically attributed to neuroendocrine mechanisms, such as  
146 activation of the HPA axis<sup>7-9</sup>. Here we provide the first evidence that persistent neural activity can  
147 contribute causally to such persistent internal states. VMHdm<sup>SF1</sup> activity may also activate longer-  
148 lasting neuroendocrine processes, as stimulation of VMHdm<sup>SF1</sup> neurons elevates serum cortisol  
149 levels<sup>11</sup>. However unlike circulating hormones, persistent activity in VMHdm<sup>SF1</sup> neurons is stimulus-  
150 specific, and may thereby prevent over-generalization of defensive responses. The observed persistent  
151 activity can be modeled best by recurrent excitatory networks incorporating fast feedback inhibition  
152 and slow peptidergic transmission<sup>43</sup>. VMHdm<sup>SF1</sup> neurons are exclusively glutamatergic, densely  
153 interconnected<sup>44</sup>, and express several neuropeptides as well as neuropeptide receptors<sup>45</sup>, properties  
154 consistent with optimal model features. While our data do not exclude a role for interconnected  
155 structures<sup>10,46</sup> in establishing persistent activity in VMHdm, they demonstrate that hypothalamic  
156 neuronal population dynamics contribute to the persistence of emotional behaviors.



## ACKNOWLEDGMENTS

We thank H. Inagaki, M. Meister, L.F. Abbott, U. Rutishauser, and members of the Anderson lab for helpful comments on the manuscript, T. Davidson and K. Deisseroth for help implementing fiber photometry, R. Remedios for help with miniscope imaging, X. Da, J.S. Chang and C. Kim for technical assistance, X. Da and C. Chiu for laboratory management and G. Mancuso for administrative support. This work was supported by NIH Grant R01 MH112593. K99 MH117264 to A.K. and a Helen Hay Whitney Foundation Postdoctoral Fellowship to L. L. D.J.A. is an Investigator of the Howard Hughes Medical Institute.

## WORKS CITED

- 1 Aksay, E. *et al.* Functional dissection of circuitry in a neural integrator. *Nat Neurosci* **10**, 494-504, doi:10.1038/nn1877 (2007).
- 2 Major, G. & Tank, D. Persistent neural activity: prevalence and mechanisms. *Current opinion in neurobiology* **14**, 675-684, doi:10.1016/j.conb.2004.10.017 (2004).
- 3 McCormick, D. A. Brain calculus: neural integration and persistent activity. *Nat Neurosci* **4**, 113-114, doi:10.1038/83917 (2001).
- 4 Curtis, C. E. & Lee, D. Beyond working memory: the role of persistent activity in decision making. *Trends Cogn Sci* **14**, 216-222, doi:10.1016/j.tics.2010.03.006 (2010).
- 5 Anderson, D. J. & Adolphs, R. *The Neuroscience of Emotion: A New Synthesis*. (Princeton University Press, 2018).
- 6 Anderson, D. J. & Adolphs, R. A framework for studying emotions across species. *Cell* **157**, 187-200, doi:10.1016/j.cell.2014.03.003 (2014).
- 7 Chen, A. Genetic Dissection of the Neuroendocrine and Behavioral Responses to Stressful Challenges in *Stem Cells in Neuroendocrinology* (eds D. Pfaff & Y. Christen) (2016).
- 8 McEwen, B. S. *et al.* Mechanisms of stress in the brain. *Nat Neurosci* **18**, 1353-1363, doi:10.1038/nn.4086 (2015).
- 9 Sapolsky, R. M., Romero, L. M. & Munck, A. U. How do glucocorticoids influence stress responses? Integrating permissive, suppressive, stimulatory, and preparative actions. *Endocrine reviews* **21**, 55-89, doi:10.1210/edrv.21.1.0389 (2000).
- 10 Gross, C. T. & Canteras, N. S. The many paths to fear. *Nature reviews. Neuroscience* **13**, 651-658, doi:10.1038/nrn3301 (2012).
- 11 Kunwar, P. S. *et al.* Ventromedial hypothalamic neurons control a defensive emotion state. *Elife* **4**, doi:10.7554/eLife.06633 (2015).
- 12 Silva, B. A. *et al.* Independent hypothalamic circuits for social and predator fear. *Nature neuroscience* **16**, 1731-1733, doi:10.1038/nn.3573 (2013).

- 13 Silva, B. A. *et al.* The ventromedial hypothalamus mediates predator fear memory. *Eur J Neurosci* **43**, 1431-1439, doi:10.1111/ejn.13239 (2016).
- 14 Wang, L., Chen, I. Z. & Lin, D. Collateral Pathways from the Ventromedial Hypothalamus Mediate Defensive Behaviors. *Neuron*, doi:10.1016/j.neuron.2014.12.025 (2015).
- 15 Ishii, K. K. *et al.* A Labeled-Line Neural Circuit for Pheromone-Mediated Sexual Behaviors in Mice. *Neuron* **95**, 123-137 e128, doi:10.1016/j.neuron.2017.05.038 (2017).
- 16 Gunaydin, L. A. *et al.* Natural neural projection dynamics underlying social behavior. *Cell* **157**, 1535-1551, doi:10.1016/j.cell.2014.05.017 (2014).
- 17 Chen, T. W. *et al.* Ultrasensitive fluorescent proteins for imaging neuronal activity. *Nature* **499**, 295-300, doi:10.1038/nature12354 (2013).
- 18 Blanchard, D. C., Griebel, G. & Blanchard, R. J. in *Eur J Pharmacol* Vol. 463 97-116 (2003).
- 19 Papes, F., Logan, D. W. & Stowers, L. The vomeronasal organ mediates interspecies defensive behaviors through detection of protein pheromone homologs. *Cell* **141**, 692-703, doi:10.1016/j.cell.2010.03.037 (2010).
- 20 Perez-Gomez, A. *et al.* Innate Predator Odor Aversion Driven by Parallel Olfactory Subsystems that Converge in the Ventromedial Hypothalamus. *Current biology : CB* **25**, 1340-1346, doi:10.1016/j.cub.2015.03.026 (2015).
- 21 Simon, P., Dupris, R. & Costentin, J. Thigmotaxis as an index of anxiety in mice: influence of dopaminergic transmissions. *Behavioral brain research* **61**, 59-64 (1994).
- 22 Berndt, A. *et al.* Structural foundations of optogenetics: Determinants of channelrhodopsin ion selectivity. *Proceedings of the National Academy of Sciences of the United States of America* **113**, 822-829, doi:10.1073/pnas.1523341113 (2016).
- 23 Ziv, Y. *et al.* Long-term dynamics of CA1 hippocampal place codes. *Nat Neurosci* **16**, 264-266, doi:10.1038/nn.3329 (2013).
- 24 Remedios, R. *et al.* Social behaviour shapes hypothalamic neural ensemble representations of conspecific sex. *Nature* **550**, 388-392, doi:10.1038/nature23885 (2017).
- 25 Pnevmatikakis, E. A. *et al.* Simultaneous Denoising, Deconvolution, and Demixing of Calcium Imaging Data. *Neuron* **89**, 285-299, doi:10.1016/j.neuron.2015.11.037 (2016).
- 26 Ben-Shaul, Y., Katz, L. C., Mooney, R. & Dulac, C. In vivo vomeronasal stimulation reveals sensory encoding of conspecific and allospecific cues by the mouse accessory olfactory bulb. *Proceedings of the National Academy of Sciences of the United States of America* **107**, 5172-5177, doi:10.1073/pnas.0915147107 (2010).
- 27 Yilmaz, M. & Meister, M. in *Current biology : CB* Vol. 23 2011-2015 (Elsevier Ltd, 2013).
- 28 Mongeau, R., Miller, G. A., Chiang, E. & Anderson, D. J. Neural correlates of competing fear behaviors evoked by an innately aversive stimulus. *J Neurosci* **23**, 3855-3868 (2003).
- 29 Evans, D. A. *et al.* A synaptic threshold mechanism for computing escape decisions. *Nature* **558**, 590-594, doi:10.1038/s41586-018-0244-6 (2018).
- 30 Brudzynski, S. Pharmacological and behavioral characteristics of 22 kHz alarm calls in rats. *Neurosci Biobehav R* **25**, 611-617 (2001).
- 31 Guo, Z. V. *et al.* Maintenance of persistent activity in a frontal thalamocortical loop. *Nature* **545**, 181-186, doi:10.1038/nature22324 (2017).
- 32 Inagaki, H. K., Fontolan, L., Romani, S. & Svoboda, K. Discrete attractor dynamics underlies persistent activity in the frontal cortex. *Nature* **566**, 212-217, doi:10.1038/s41586-019-0919-7 (2019).
- 33 Brody, C. D., Romo, R. & Kepecs, A. Basic mechanisms for graded persistent activity: discrete attractors, continuous attractors, and dynamic representations. *Current opinion in neurobiology* **13**, 204-211, doi:10.1016/s0959-4388(03)00050-3 (2003).
- 34 Goldman, M., Compte, A. & Wang, X.-J. Neural Integrators: recurrent mechanisms and models. *New Encyclopedia of Neuroscience*, 1-26 (2007).

- 35 Wang, X.-J. Synaptic reverberation underlying mnemonic persistent activity. *Trends in Neuroscience* **24**, 455-463 (2001).
- 36 Durstewitz, D., Seamans, J. K. & Sejnowski, T. J. Neurocomputational models of working memory. *Nat Neurosci* **3**, 1184 (2000).
- 37 Jan, Y. N., Jan, L. Y. & Kuffler, S. W. Further evidence for peptidergic transmission in sympathetic ganglia. *Proceedings of the National Academy of Sciences of the United States of America* **77**, 5008-5012, doi:10.1073/pnas.77.8.5008 (1980).
- 38 Canteras, N. S., Chiavegatto, S., Ribeiro do Valle, L. E. & Swanson, L. W. Severe reduction of rat defensive behavior to a predator by discrete hypothalamic chemical lesions. *Brain Res Bull* **44**, 297-305 (1997).
- 39 Zelikowsky, M. *et al.* The Neuropeptide Tac2 Controls a Distributed Brain State Induced by Chronic Social Isolation Stress. *Cell* **173**, 1265-1279 e1219, doi:10.1016/j.cell.2018.03.037 (2018).
- 40 Wang, X. J. Synaptic basis of cortical persistent activity: the importance of NMDA receptors to working memory. *J Neurosci* **19**, 9587-9603 (1999).
- 41 Sompolinsky, H., Crisanti, A. & Sommers, H.-J. Chaos in random neural networks. *Physical review letters* **61**, 259 (1988).
- 42 Toyozumi, T. & Abbott, L. F. Beyond the edge of chaos: amplification and temporal integration by recurrent networks in the chaotic regime. *Phys. Rev. E* **84**, 051908(051908), doi:10.1103/PhysRevE.84.051908 (2011).
- 43 Jan, Y. N., Jan, L. Y. & Kuffler, S. W. A peptide as a possible transmitter in sympathetic ganglia of the frog. *Proceedings of the National Academy of Sciences of the United States of America* **76**, 1501-1505, doi:10.1073/pnas.76.3.1501 (1979).
- 44 Lo, L. *et al.* Connectional architecture of a mouse hypothalamic circuit node controlling social behavior. *Proceedings of the National Academy of Sciences of the United States of America* **116**, 7503-7512, doi:10.1073/pnas.1817503116 (2019).
- 45 Kim, D.-W. *et al.* Multimodal analysis of cell types in a hypothalamic node controlling social behavior. *Cell in press* (2019).
- 46 Canteras, N. S. The medial hypothalamic defensive system: hodological organization and functional implications. *Pharmacology, biochemistry, and behavior* **71**, 481-491 (2002).

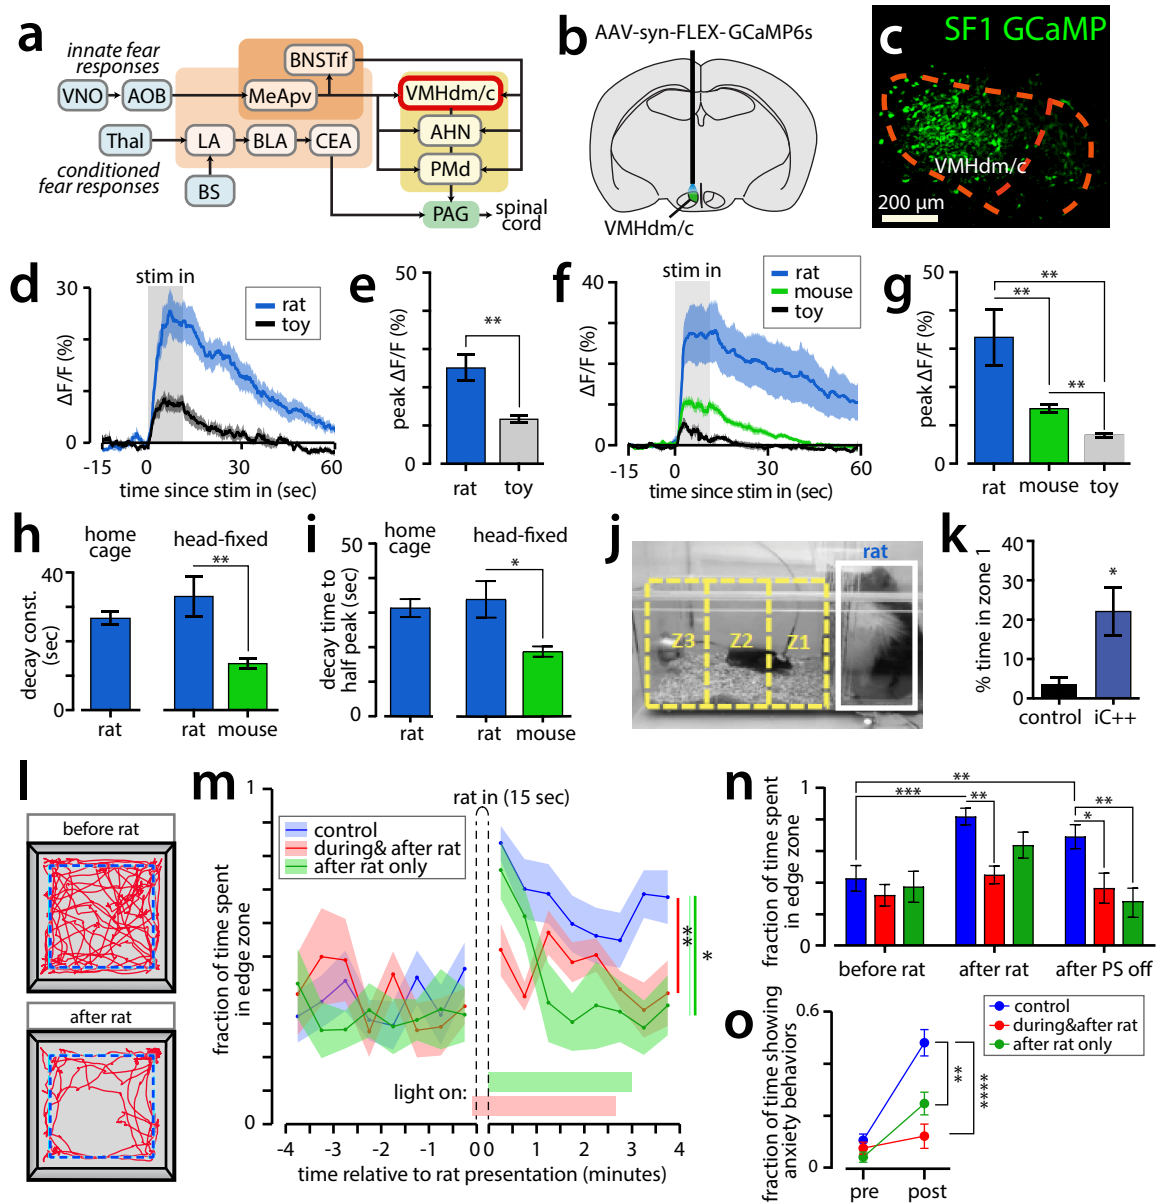

**Figure 1. Persistent activity in VMH SF1+ neurons evoked by predatory and conspecific cues.**

**a**, Circuits for innate and learned fear. Abbreviations below. **b**, Site of fiber photometry in VMHdm/c (green). **c**, GCaMP6s expression in VMHdmSF1 neurons. **d**, Activity of SF1+ neurons in freely moving mice exposed to a live or toy rat for 10 seconds (gray shading). (n = 4 mice; mean ± SEM). **e**, Peak activity from (d) (n = 4 mice; mean ± SEM). **f**, Responses of VMHdmSF1 neurons in head-fixed mice to rat, mouse, or toy rat (n=8 mice; mean ± SEM). **g**, Peak activity from (f) (n = 8 mice; mean ± SEM). **h**, **i**, Decay constants (h) or time to half-peak (i) of activity in freely moving (“home cage”) or head fixed mice (mean ± SEM; home cage n = 4; head-fixed n = 8). **j**, Home cage rat exposure assay. **k**, Percent time in zone 1 during 3-minute rat presentation (PS; n=7 control mice; n=7 iC++ mice; mean ± SEM). **l**, Tracking of mouse in open field rat exposure assay, blue line marks “edge zone”. **m**, Fraction of time spent in edge zone. Colored horizontal bars denote PS periods (n = 12 control mice, n = 6 iC++ mice with PS during+after rat; n = 6 iC++ mice with PS after rat only). \* p < 0.05; \*\* p < 0.01, repeated measures ANOVA test. Data are mean ± SEM.) **n**, Mean time in edge zone, times defined in Methods. **o**, Expression of anxiety behaviors (see Methods) before vs after rat exposure. (mean ± SEM).

VNO - vomeronasal organ, AOB - accessory olfactory bulb, MeApv –posteroventral medial amygdala, BNSTif – interfascicular part of bed nucleus of the stria terminalis, VMHdm – doromedial ventromedial hypothalamus, AHN – anterior hypothalamic nucleus, PMd - dorsal premammillary nucleus, PAG - periaqueductal gray, Thal – thalamus, LA – lateral amygdala, BS – brain stem, BLA – basolateral amygdala, CEA – central amygdala.

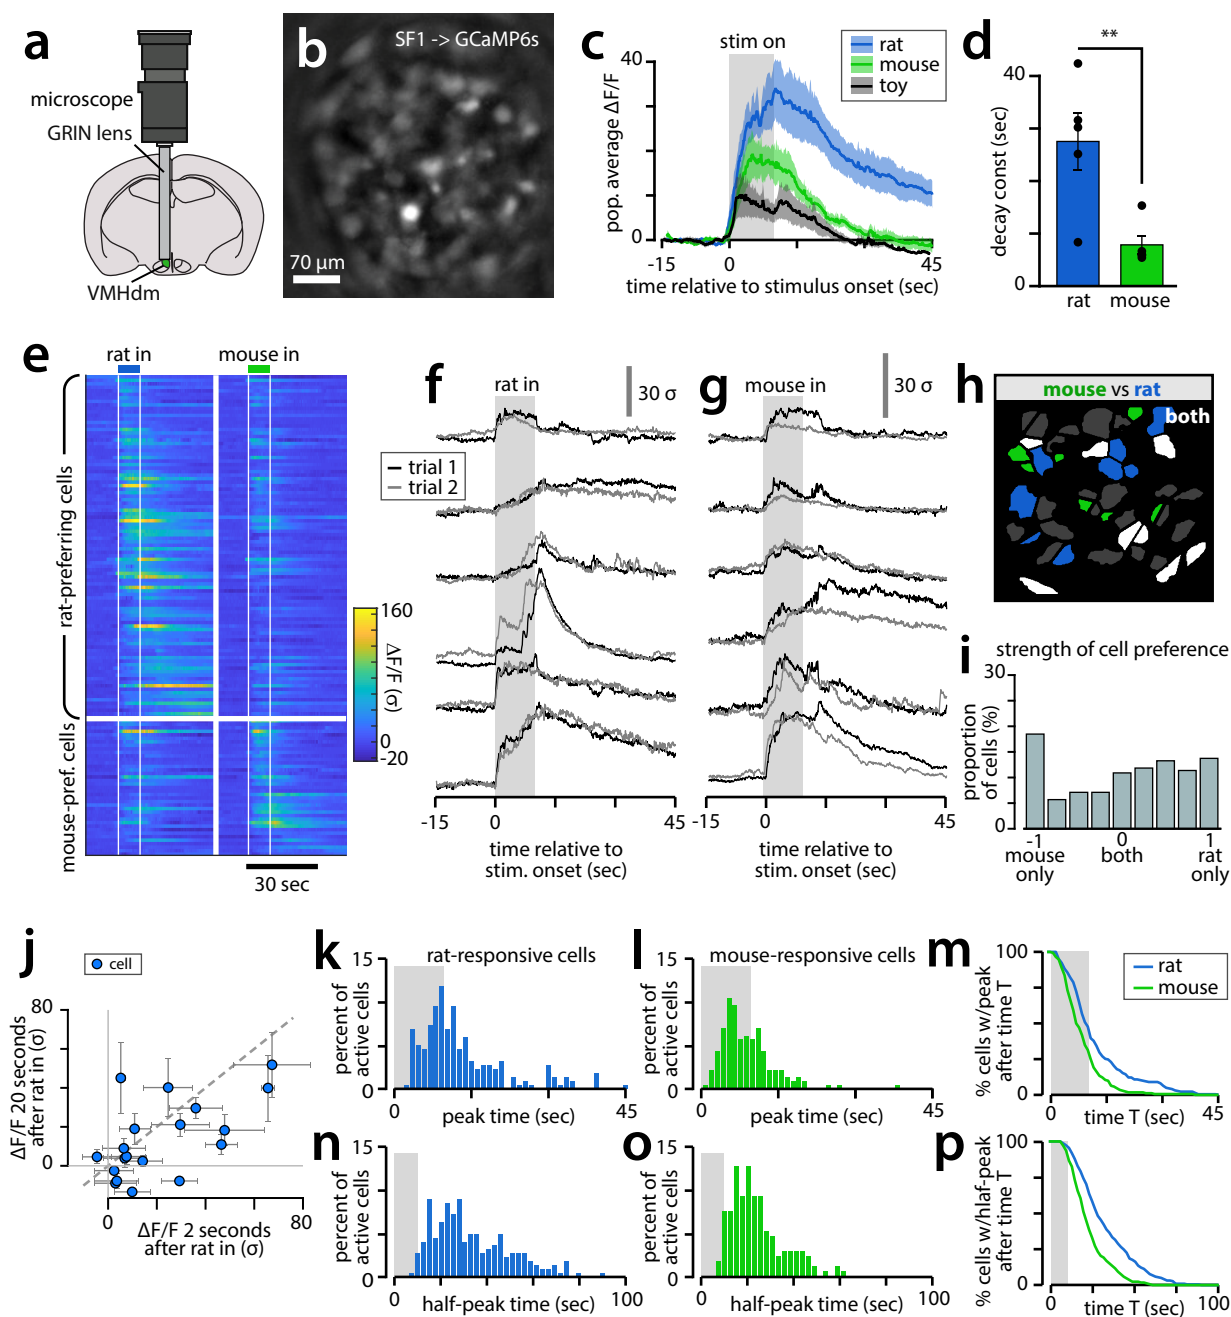

## Figure 2. Microendoscopic imaging reveals persistent activity at the single cell level.

**a**, Microendoscopic imaging in VMHdm/c. **b**, Field of view in an imaged mouse. **c**, Mean population response of imaged neurons to each stimulus ( $n = 2$  trials/mouse from 5 mice, mean  $\pm$  SEM). **d**, Fit decay constants of population response to rat and mouse ( $n=5$  mice, mean  $\pm$  SEM). **e**, Rat- and mouse-responsive neuron responses (from  $n=5$  mice, mean over 2 trials). **f**, Example cells responding to rat in one imaged mouse on two repeated trials. **g**, Example cells responding to mouse on two repeated trials (same mouse as (f)). **h**, Example spatial map of cells responsive to rat, mouse, or both (white). **i**, Histogram of cell tuning preference for rat vs. mouse. Cells at  $\pm 1$  respond exclusively to rat or mouse, respectively; cells at 0 ("both") respond equally to both stimuli ( $n = 219$  cells from 5 mice across 3 days of imaging). **j**, Scatterplot comparing cell responses at 2 vs 20 seconds after rat introduction, in one example mouse. **k**, Peak time for rat-responsive cells ( $n = 202$  rat-responsive cells from 5 mice across 3 days of imaging). **l**, Peak time for mouse-responsive cells ( $n = 160$  mouse-responsive cells from 5 mice across 3 days of imaging). **m**, Fraction of cells with peak after time T. **n**, Half-peak time for rat-responsive cells ( $n$  same as k). **o**, Half-peak time for mouse-responsive cells ( $n$  same as l). **p**, Fraction of cells with half-peak later than time, legend as in (m).



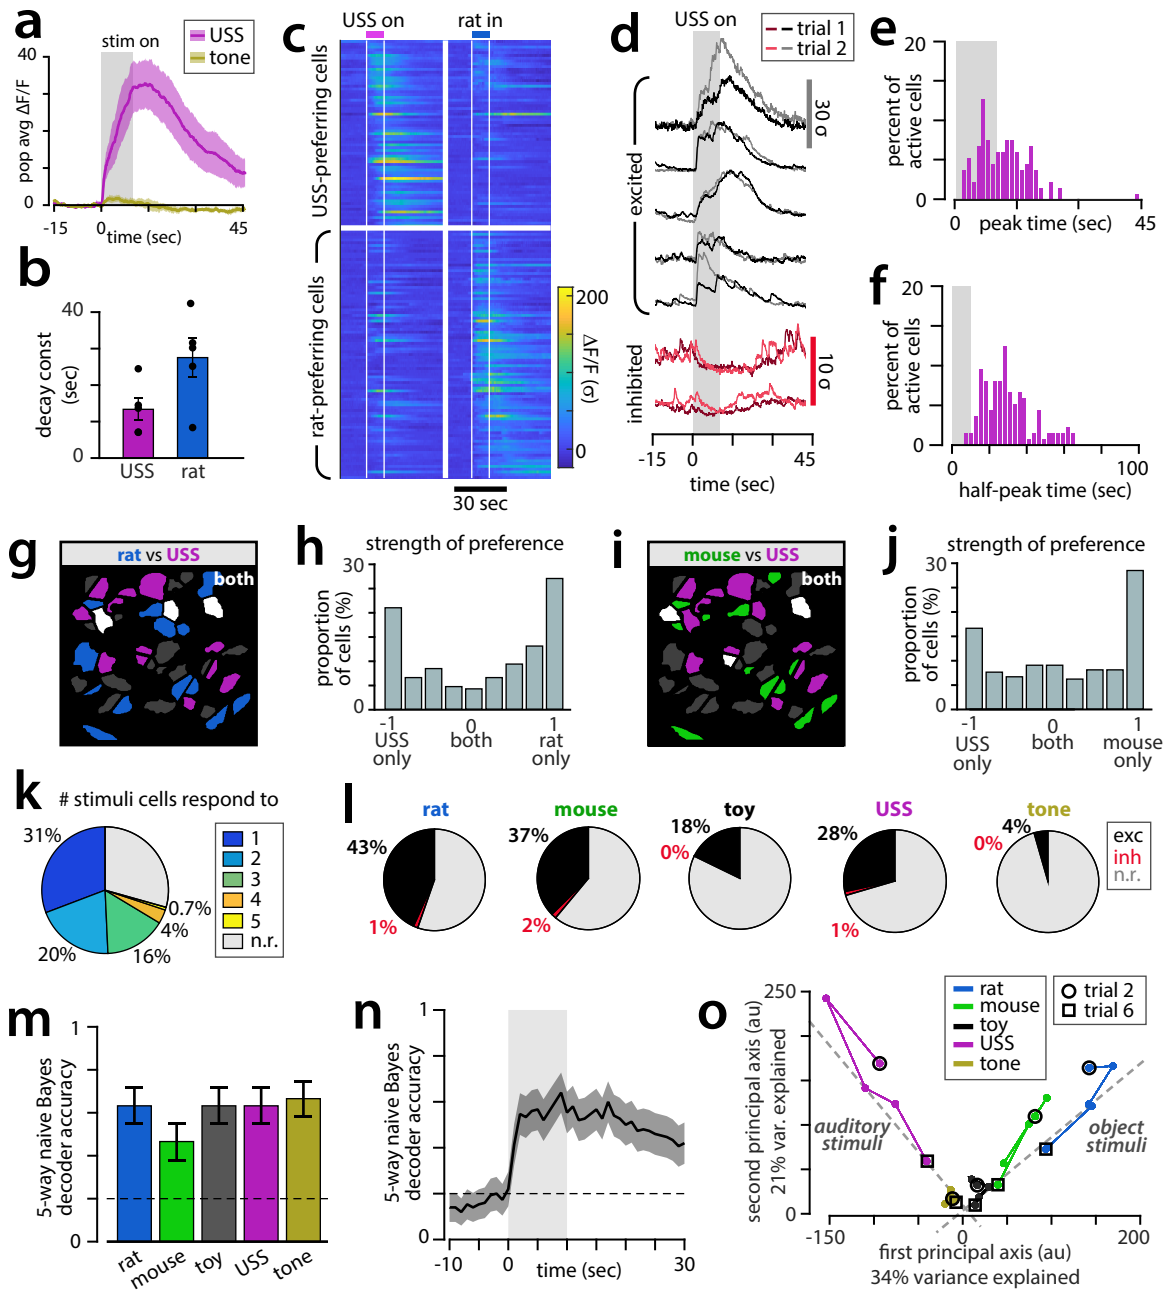

**Figure 3. SF1+ neurons respond to a threatening auditory stimulus, and encode stimulus identity.**

**a**, Mean VMHdmSF1 population response to USS and tone (n = 5 mice, mean ± SEM). **b**, Fit decay constants of population response to USS (rat reproduced from Fig2d for comparison). **c**, Example cells responding to USS in one imaged mouse, on two repeated stimulus presentations (dark trace: 1st presentation; light trace: 2nd presentation). Black = excited cells, red = inhibited cells. **d**, Response peak time of USS-responsive cells (n = 133 USS-responsive cells from 5 mice across 3 days of imaging). **e**, Response half-peak time for USS-responsive cells (n same as (d)). **f**, Example spatial map of cells responsive to rat, USS, or both (white). **g**, Histogram of cell tuning preference, rat vs USS (n = 216 cells from 5 mice across 3 days of imaging). **h**, Example spatial map of cells responsive to mouse and USS. **i**, Histogram of cell tuning preference, mouse vs USS (n = 219 cells from 5 mice across 3 days of imaging). **j**, Percent of cells responding to zero to five out of five stimuli. **k**, Percent of cells excited or inhibited by each stimulus. **l**, Accuracy of a 5-way Naïve Bayesian decoder for stimulus identity, trained on six trials across three days of imaging (n=5 mice; mean ± SEM). **m**, Decoder accuracy as a function of time. **n**, Principal component analysis (PCA) of time-averaged population responses, pooled across mice, from 5 trials per stimulus across 3 days of imaging.

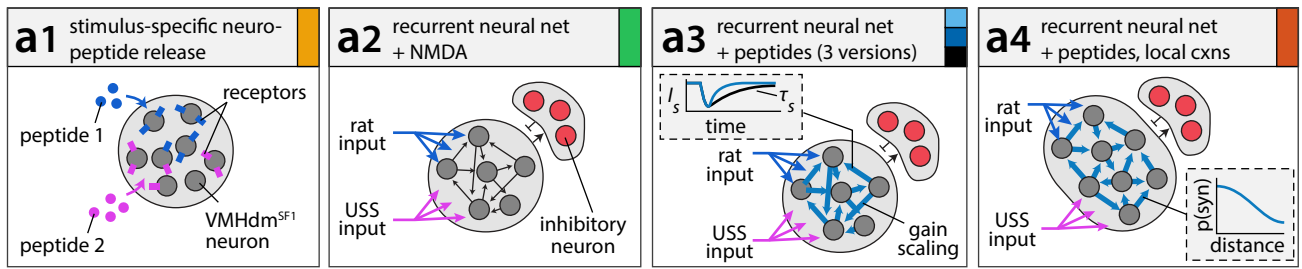

Feature 1: time-evolving population code

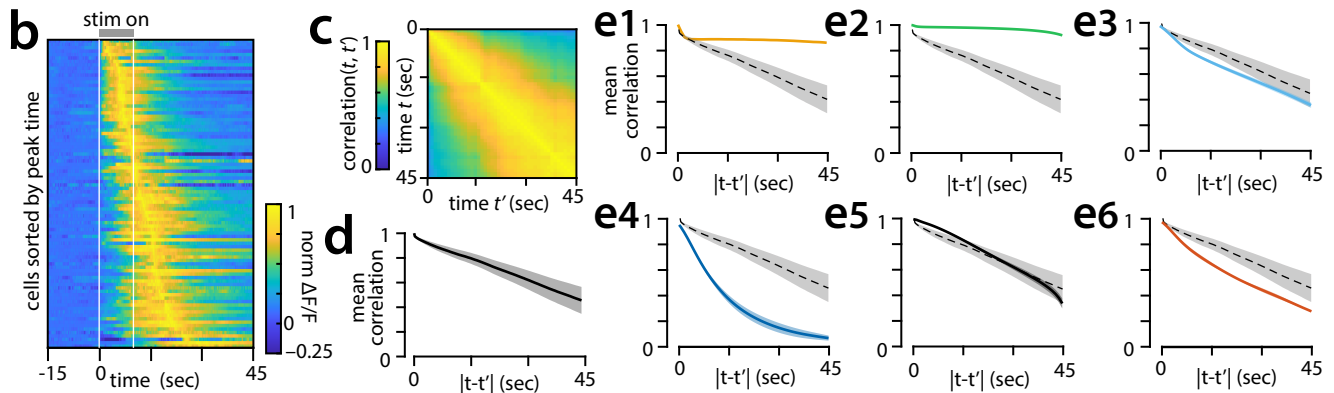

Feature 2: stimulus specificity

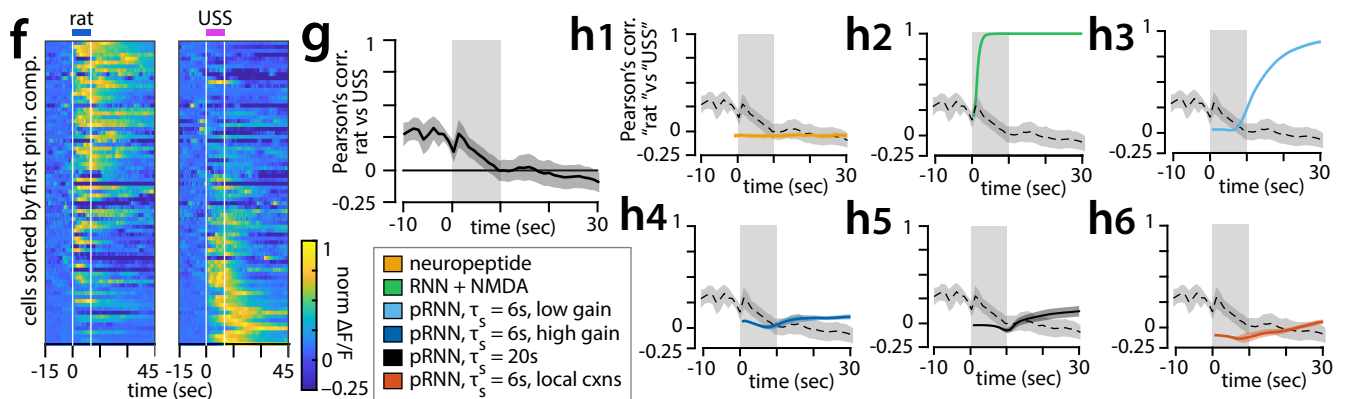

Summary

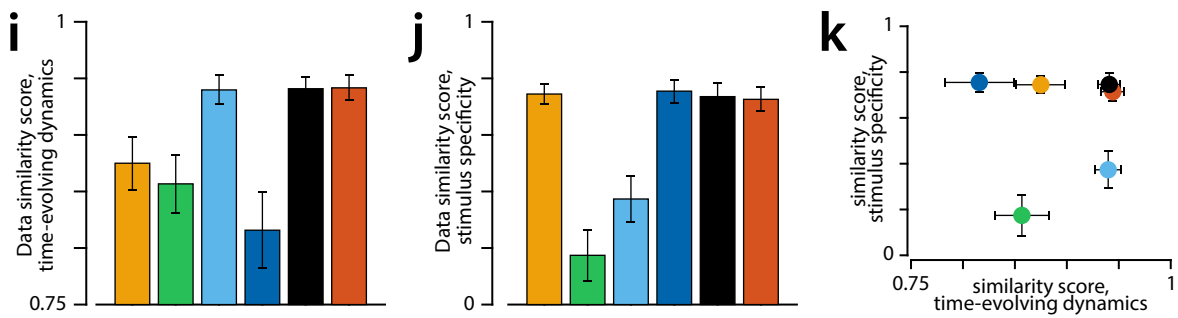

**Figure 4. Data constrains set of possible mechanisms for persistent neural activity.**

**a** Six tested models of persistent activity. **a1** slow-acting neuropeptide activation, no connectivity between model neurons. **a3** recurrent excitation in a randomly connected network with fast inhibitory feedback; persistence maintained via NMDA channels, time constant of NMDA excitation is  $\tau_s = 200\text{ms}$ . **a3** as in **a2**, replacing NMDA with slow peptidergic excitation (light/dark blue,  $\tau_s = 6\text{sec}$ ; black,  $\tau_s = 20\text{sec}$ ), tested for different strengths of recurrent synapses (“gain scaling”, light/dark blue). **a4** as in **a3**, but with “local connectivity” in which probability of a synapse  $p(\text{syn})$  between neurons decreased with distance (inset). **b** Trial-averaged, normalized  $\Delta F/F$  traces from USS-responsive neurons, sorted by time of response peak. **c** Autocorrelation matrix of USS-evoked population activity. **d** Time-averaged autocorrelation of USS-evoked population activity ( $n=5$  mice, mean  $\pm$  SEM). **e** Autocorrelation as in **d**, for each model; model identity indicated by line color (legend in panel **h**), dashed line = data ( $n=10$  repeat simulations, mean  $\pm$  SEM). **f** Trial-averaged  $\Delta F/F$  traces from rat- or USS-responsive neurons, sorted by projection on first principal component. **g** Pearson’s correlation between rat- vs USS-evoked population activity as a function of time. **h** Pearson’s correlation between simulated “rat” and “USS” inputs to each model, dashed line = data ( $n=10$  repeat simulations, mean  $\pm$  SEM). **i** “Similarity score” (see Methods) of models vs. data, summarizing plots in (**e**). ( $n=5$  mice, mean  $\pm$  SEM). **j** Similarity score of model vs data, summarizing plots in **h**. ( $n=5$  mice, mean  $\pm$  SEM). **k** scatter plot of **i-j**.



## 1 METHODS

2 **Animals.** All experimental procedures involving the use of live animals or their tissues were performed in  
3 accordance with the NIH guidelines and approved by the Institutional Animal Care and Use Committee  
4 (IACUC) and the Institutional Biosafety Committee at the California Institute of Technology (Caltech). SF1-  
5 Cre mice were obtained from Dr. Brad Lowell <sup>1</sup> and maintained as heterozygotes in the Caltech animal  
6 facility as described previously; the SF1-Cre line is also available from the Jackson Laboratory (Stock No:  
7 012462). An account of the specificity of SF1-Cre expression within VMH and characterization of neurons  
8 labeled by Cre-expression can be found in <sup>2</sup>. Male mice, heterozygotes or their wild-type littermates aged  
9 between 8 to 20 weeks were used in this study. All mice were housed in ventilated micro-isolator cages  
10 in a temperature- and humidity- controlled environment under a reversed 12 hour dark-light cycle, and  
11 had free access to food and water. Mouse cages were changed weekly on a fixed day on which  
12 experiments were not performed. Long-Evans rats (for use as predators) were obtained from Charles  
13 River at 2-3 months of age, and raised to 5-10 months in the Caltech animal facilities.

14 **Virus.** AAV1.Syn.Flex.GCaMP6s.WPRE.SV40 (CS1113) was obtained from the Penn Vector Core.  
15 AAV5.EF1a.DIO.iC++.eYFP and AAV2.EF1a.DIO.hChr2.eYFP.WPRE.pA were obtained from the University  
16 of North Carolina Vectors Core.

17 **Surgery.** Mice 8-20 weeks old were anesthetized with 5% isoflurane and mounted in a stereotaxic  
18 apparatus (Kopf Instruments). 1% - 1.5% isoflurane was used to maintain the anesthesia throughout the  
19 surgery procedure. An incision was made to exposure the skull and small craniotomies were made dorsal  
20 to each injection site with a stereotaxic mounted drill. Virus suspension (~600 nl) was injected to the  
21 VMHdm/c (ML +/- 0.5, AP -4.65, DV -5.6) at a rate of 60 nl/minute using a pulled glass capillary (~40  $\mu$ m  
22 inner diameter at tip) mounted in a nanoliter injector (Nanoliter 2000, World Precision Instruments)  
23 controlled by a four channel micro controller (Micro4, World Precision Instruments). Capillaries were kept  
24 in place for 10 minutes following injections to allow the adequate diffusion of virus solution and to reduce  
25 the virus backflow during capillary withdraw.

26 For fiber photometry, a custom-made unilateral fiber cannula (400  $\mu$ m in core diameter, 0.48 NA, Doric  
27 Lenses) was implanted after virus injection (ML +/-0.4, AP -4.65, DV -5.4). Metabond (Parkell) and dental  
28 cement (Bosworth) were applied to secure the implanted ferrule and cover the exposed skull. For  
29 optogenetics, a custom-made bilateral fiber cannula aimed 500  $\mu$ m above each injection site (200  $\mu$ m in  
30 core diameter, 0.37 NA, Doric Lenses) was implanted and held in place with Metabond and dental cement.

31 Surgery for microendoscopic imaging was performed as previously described<sup>3</sup>. Briefly, we first performed  
32 a series of titration experiments of the original viral stock, to determine the virus concentration at which  
33 the brightest cytoplasmic but non-nuclear GCaMP6s expression could be observed in slices of fixed brain  
34 tissue of the injected mice 4 weeks after injection. The optimal viral dilution was then used to inject mice  
35 for *in vivo* imaging as described above. 2-3 weeks after viral injections, mice were implanted with a  
36 graded-index (GRIN) lens (diameter - 0.5 mm, length - 8.4 mm, catalogue #1050-002212, Inscopix) using  
37 a supporting device (Proview Implant Kit, cat# 1050-002334, Inscopix). The implantation depth of the lens  
38 was determined based on the live visualization of (anesthetized) neural activity as the lens was inserted.  
39 Metabond was used to stabilize the lens, and Kwik-Sil sealant (World Precision Instruments) was used to  
40 cover the lens surface. After another 2-3 weeks, mice were anesthetized for placement of a  
41 microendoscope baseplate (cat# 1050-002192, Inscopix) and a baseplate cover (catalogue #1050-002193,

42 Inscopix) was used to protect the lens when not in use. Five out of twenty implanted animals were  
43 selected for *in vivo* imaging studies based on clarity of cytoplasmic GCaMP6s expression.

44 **Stimuli Presentation.** Stimuli were presented either in the mouse's home cage or in a head-fixation set  
45 up. In the home cage, a hand-held anesthetized rat weighing 400-600 g was brought in close proximity to  
46 the mouse. A stuffed toy rat of approximately the same size as the live rat was used as a control. For the  
47 head-fixed preparation, the mouse was placed on a plastic running wheel (15.5 cm diameter) and  
48 stabilized by the head-plate (World Precision Instruments, Catalogue #503617) with a custom made  
49 tethering system. Animals were habituated to the head-fixation setup for 1 hour each day for 2-3 days  
50 before experiments began. Physical stimuli (an awake behaving rat, a conspecific BALB/6 male mouse or  
51 a toy rat) were each presented inside a small wire mesh cage, which was held by the experimenter in front  
52 of the experimental mouse. Auditory stimuli were presented at 85 dB SPL from above the animal. The  
53 ultrasound stimulus (USS) consists of repeated 100 ms frequency sweeps from 17-20 kHz, as described  
54 previously<sup>4</sup>. A pure tone of 2 kHz was used as a control. Rat urine was collected in-house and kept at 4°C  
55 for up to two weeks. A cotton swab soaked with 100 µl of rat urine or water was presented in front of the  
56 experimental mouse. 500 ms looming stimulus was displayed on an overhead screen above the mouse  
57 home cage 10 times with 500 ms inter stimulus interval. All stimuli were pseudo-randomized and  
58 presented for 10 seconds unless otherwise clarified, with an inter-trial interval of at least five minutes.  
59 For microendoscopic imaging, two trials for each stimulus were presented on each of three consecutive  
60 days.

61 **Optogenetic manipulation.** Optogenetic experiments were performed as described in<sup>2</sup>. Animals were  
62 briefly anaesthetized by isoflurane to connect the fiberoptic patch cord to the bilateral implanted optic  
63 cannula (Doric Lenses). Mice were then allowed to recover for at least 15-20 minutes in their home cage  
64 before being transferred to the behavioral testing room. Light for both iC++ and ChR2 activation was  
65 delivered via a 473nm laser (Shanghai Laser) controlled by a signal generator (A-M systems, isolated pulse  
66 stimulator). Laser intensity was calibrated at the distance of 0.5 mm below the implanted fiber tip. 3  
67 minutes continuous light was used for iC++ activation; 10 seconds (20 Hz, 20 ms pulse width) pulse trains  
68 was used for ChR2 activation.

69 **Home cage rat exposure assay.** The mouse home cage was placed into a custom made testing apparatus  
70 (35 x 40 x 40 cm), and video of behavior was collected from a side-view camera. After a 6 minute baseline,  
71 a predator rat in a cage with a mesh wall (10 x 20 x 35 cm) was placed at one end of the mouse home  
72 cage. Ethovision XT software was used to track mouse position and quantify time spent in proximity to  
73 the rat.

74 **Open field rat exposure assay.** The mouse was placed in a plastic open top arena (50 x 50 cm, 30 cm  
75 walls), with behavior captured using an overhead mounted camera. Following a 10 minute baseline, a rat  
76 held in a cage with a mesh wall was held in close proximity to the mouse for 15 seconds, and then removed.  
77 Behavior of the mouse was then recorded for an additional 6 minutes. For behavior quantification,  
78 Ethovision tracking data was segmented into 30-second chunks, and percent of time spent in the "edge  
79 zone" (within 4cm of arena walls) was quantified. For bar graphs in **Fig 1n**, we define before rat = average  
80 over a window from -1 to 0 min relative to rat presentation, after rat = average from 0-1 min after the rat  
81 was removed, and after PS off = average from 3-4 min after rat was removed. Anxiety behaviors for **Fig**  
82 **1o** were defined as thigmotaxis, immobility, and jumping (escape attempts) and were manually annotated

83 at 30Hz. Pre and post windows correspond to -3 to 0 and 0 to 3 min, respectively, relative to rat  
84 presentation.

85

86 **Fiber photometry data acquisition and processing.** Fiber photometry was performed as described in <sup>5</sup>.  
87 Briefly, two LEDs modulated at different frequencies (490 nm and 405 nm, Thorlabs) were used to excite  
88 GCaMP6s-expressing neurons via implanted optical fiber. Excitation light at 490 nm activates GCaMP6s in  
89 a calcium-dependent manner, while excitation at 405 nm activates GCaMP6s in a calcium-independent  
90 manner, thus the 405nm signal can be used to control for bleaching and movement artifacts in the 490nm  
91 channel. A photometer (Newport Femtowatt Photoreceiver) received GCaMP6s fluorescent signals, and  
92 custom-designed software separated the signals generated by the two LEDs. The output power of both  
93 LED was set between 30-50  $\mu$ W at the fiber tip to obtain an optimal baseline fluorescence without  
94 photobleaching.

95 To calculate  $\Delta F/F$  of the 490nm signal, we normalized it to the 405nm baseline as in <sup>5</sup>. The 405nm signal  
96 was scaled to match the amplitude of the 490nm signal using linear regression, and  $\Delta F/F$  computed as  
97  $(490\text{nm signal} - \text{scaled } 405\text{nm signal}) / (\text{scaled } 405\text{ nm signal})$ .

98 **Microendoscopic imaging data acquisition and processing.** We used a head-mounted miniaturized  
99 microscope (nVista, Inscopix) for calcium imaging. Pilot experiments were done to identify imaging  
100 parameters that produced the clearest signal to noise ratio while limiting photobleaching. All mice except  
101 one were recorded at 11 Hz with 90.0ms exposure time, 10-20% LED illumination and 1.5 - 2.5x gain; the  
102 remaining mouse was imaged at 20Hz with 50ms exposure time. A custom-built system was used to  
103 synchronize the cameras for behavioral recordings and devices for neural recordings and stimuli delivery.

104 Imaging frames were spatially downsampled by a factor of two in the X and Y dimensions, and spatially  
105 high-pass filtered with a cutoff spatial frequency of 40  $\mu$ m. All frames collected over the course of a single  
106 day were then concatenated into a single stack and registered to each other to correct for motion artifacts  
107 using a rigid-body transformation (TurboReg plugin for ImageJ). Single cell  $\text{Ca}^{2+}$  activity traces and spatial  
108 filters were extracted from the registered movie using CNMF-E<sup>6</sup>. Extracted traces and ROIs were manually  
109 screened to remove neuropil or other non-neuronal signals. The cleaned set of cells were then registered  
110 across three consecutive days of imaging as described in <sup>3</sup>. Briefly, all extracted spatial filters from a given  
111 day of imaging were added to create a cell map, and intensity-based image registration was used to  
112 identify a pair of rigid-body transformations to align the day 1 and 3 maps to the day 2 maps. Overlapping  
113 triplets of spatial filters for the three days were identified by finding cells on day 1 and 3 with the smallest  
114 Euclidean distance to each day 2 cell. All identified triplets were then manually screened for accuracy.  
115 Roughly half of all cells could be registered across all three days of imaging.

116 **Spike inference.** Spiking of  $\text{Sf1}^+$  neurons was estimated from extracted GCaMP fluorescence traces using  
117 the constrained deconvolution approach of <sup>7</sup>. Calcium transients were modeled as a first-order  
118 autoregressive (AR) process, and with the exception of the AR coefficient  $\gamma$  (GCaMP decay rate), model  
119 parameters were fit as in <sup>7</sup> to all data from each cell on a given day of imaging. The value of  $\gamma$  was selected  
120 to give a GCaMP half-decay time of two seconds, following the expected decay kinetics of GCaMP6s in  
121 high firing rate conditions<sup>8</sup>. This is a conservative estimate (other reported half decay times of AAV-  
122 GCaMP6s range from 510ms to 1.8sec<sup>9</sup>) to obtain an approximate upper limit on the contribution of slow  
123 GCaMP dynamics to the observed persistence of  $\text{SF1}^+$  population activity.

124 **Units of neuronal activation.** Stimulus-evoked responses of SF1<sup>+</sup> neurons are reported in units of baseline  
125 standard deviation,  $\sigma$ , defined as the standard deviation of observed fluorescence in a 30-second pre-  
126 stimulus baseline.

127 **Fitting decay constants in fiber photometry and population average microendoscope data.** The stimulus-  
128 evoked response of the SF1<sup>+</sup> population could be well fit by a difference of exponentials of the form  
129  $K(t) = A \cdot (\tau_{\text{decay}} - \tau_{\text{rise}})^{-1} (e^{-t/\tau_{\text{rise}}} - e^{-t/\tau_{\text{decay}}})$ , where  $t$  is time in seconds, and  $A$ ,  $\tau_{\text{decay}}$ , and  $\tau_{\text{rise}}$   
130 are fit parameters characterizing the amplitude and kinetics of the response. Values of  $\tau_{\text{decay}}$ , and  $\tau_{\text{rise}}$   
131 were fit for each trial to minimize the mean squared error between  $K(t)$  and the SF1<sup>+</sup> population  
132 response over a 30 second window following the start of stimulus presentation, using the *fminunc*  
133 function in Matlab.

134 **Identifying stimulus-responsive cells.** Some analyses, such as calculation of time to peak or half-peak  
135 strength of stimulus preference, were performed only on cells that showed a significant response to the  
136 stimulus or stimuli in question. For these analyses, we defined a pre-stimulus baseline as the  $\Delta F/F$  in a  
137 ten-second window prior to stimulus presentation, and defined responsive cells as those neurons for  
138 which the average  $\Delta F/F$  value for any one-second window in the first 30 seconds after stimulus  
139 presentation was more than four standard deviations above the mean of baseline activity on that trial.  
140 Only cells that passed this criterion on both trials within a day were included for analysis.

141 **Finding peak and decay to half-peak times.** The time of the peak population response was defined as the  
142 first time (relative to start of stimulus presentation) the population  $\Delta F/F$  passed 95% of its maximum  
143 observed value on a given trial. The time to decay to half-peak was defined as the last time the population  
144  $\Delta F/F$  was above 50% of its maximum value relative to pre-stimulus baseline. This analysis was performed  
145 separately for each cell on each day of imaging, using only stimulus-responsive cells (see above); values  
146 were averaged across two repeated stimulus presentations.

147 **Strength of cell preference.** The strength of cell preference for either of a pair of stimuli (**Fig 2g** and **Fig**  
148 **3i,k**) was defined as  $|s_a - s_b| / (|s_a| + |s_b|)$ , where  $s_a$  and  $s_b$  are the average  $\Delta F/F$  of that cell in a 45-  
149 second window following stimulus onset, for stimulus pair  $a$  vs  $b$  (eg rat vs USS). This analysis was  
150 performed separately for each cell on each day of imaging, using only cells that responded to either one  
151 (or both) of the two stimuli, as defined above; values of  $s_a$  and  $s_b$  were averaged across two repeated  
152 stimulus presentations.

153 **Decoder analysis.** Stimulus identity was decoded from the activity of all SF1<sup>+</sup> neurons that could be reliably  
154 tracked across three days of imaging, using a two-class or five-class cross-validated Naïve Bayes decoder  
155 (*fitcnb* in Matlab). Bar plots of decoder accuracy (**Fig 3n**) and confusion matrix (**ED 7a**) were generated  
156 using held-out test data for a five-class Naïve Bayes decoder trained on the time-averaged responses of  
157 imaged neurons in a window from 30 seconds before to approximately 60 seconds after stimulus  
158 presentation. Time-evolving plots of decoder accuracy (**Fig 3o**, **ED 8b-c**) were constructed by training a  
159 separate cross-validated decoder on the time-averaged activity of imaged neurons in a one-second  
160 window, for each one-second window from 10 seconds before to 30 seconds after stimulus presentation.  
161 Decoder performance is reported as the average prediction accuracy on held-out test data; chance  
162 accuracy is 1/2 for the two-class decoder and 1/5 for the five-class decoder.

163 **Stimulus-evoked autocorrelation.** We constructed the standard correlation matrix  $C$  of VMHdm<sup>SF1</sup> cell  
164 activity, defined as the pairwise correlation coefficient between all columns of a neurons x time matrix of

165 imaged activity. Values in C were averaged across each trial for a given stimulus over three days of imaging,  
166 and then averaged across n=5 imaged mice, for all imaging frames from zero to 45 seconds relative to the  
167 onset of stimulus presentation (imaging framerate was 11Hz). The mean correlation for lag  $\Delta t$  was  
168 computed by averaging  $C(x, x+\Delta t)$  for all x between 0 and 45- $\Delta t$  seconds.

169 The same calculation was used for simulated data, with correlations computed every 10 simulation  
170 timesteps (10ms). To make values comparable to the experimental data, model cell spikes were convolved  
171 with a pair of exponential filters with time constants of 0.5 seconds and 1.5 seconds, simulating the  
172 kinetics of the GCaMP6s response.

173 **Rat/USS Pearson's correlation.** The Pearson's correlation between rat and USS responses was computed  
174 for each mouse using the trial-averaged response of all neurons on the first day of imaging. Pearson's  
175 correlation was computed between the vectors of population activity from 10 seconds before to 30  
176 seconds after stimulus onset, sampled at 11Hz (acquisition frequency).

177 For simulated data, the "rat" and "USS" inputs were assumed to be excitatory inputs to a randomly  
178 selected fraction of neurons in the model (temporal structure of stimulus and percent of neurons receiving  
179 input specified below for each model). Pearson's correlation between these two stimuli was computed  
180 across all model cells that fired 10 or more spikes across the two stimuli. GCaMP6s kinetics were simulated  
181 as for the stimulus-evoked autocorrelation analysis.

182 **Neuropeptide model.** For this model we assumed that VMHdm<sup>SF1</sup> neuron dynamics were determined  
183 entirely by long-lasting peptidergic input, and that there were no recurrent connections between neurons  
184 within VMHdm. Given a model population of N = 1000 neurons, we assumed that a random 10% of  
185 neurons received peptidergic input for any given stimulus. For cells receiving stimulus-evoked input, we  
186 modeled the firing rate  $r_i(t)$  of neuron  $i$  as  $r_i(t) = g \cdot p_i(t)$ , where  $g \sim U(0,60)$  sets the strength of  
187 excitatory peptidergic input onto neuron  $i$  and  $p_i(t)$  is a stimulus-evoked peptide-mediated excitatory  
188 current. Dynamics of  $p_i(t)$  evolve as  $\tau_p \frac{dp_i}{dt} = -p_i(t) + \delta(t)$ , where  $\delta(t)$  is the delta function and  $\tau_p =$   
189 25 sec, the decay time constant that sets the duration of peptidergic excitation, was set to match the  
190 observed decay time constant of the population average VMHdm<sup>SF1</sup> response. To simulate spiking, the  
191 firing rate  $r_i(t)$  was used to set the instantaneous rate constant of a non-homogeneous Poisson process  
192 with a simulation timestep of  $dt = 1ms$ .

193 **Spiking recurrent neural network model + NMDA.** We constructed a model population of N = 1000  
194 standard current-based leaky integrate-and-fire neurons, in which each neuron has membrane potential  
195  $x_i$  characterized by dynamics  $\tau_m \frac{dx_i}{dt} = -x_i(t) + I(t)$ , where  $\tau_m = 20ms$  is a membrane time constant  
196 and  $I$  (specified below) is a combination of external and recurrent inputs. To model spiking, we set a  
197 threshold  $\theta$  (typically  $\theta=0.1$ ) such that when the membrane potential  $x_i(t) > \theta$ ,  $x_i(t)$  is reset to 0 and  
198 instantaneous spiking rate  $r_i(t)$  is set to 1. Spiking-evoked input to postsynaptic neurons was modeled as  
199 a synaptic current with dynamics  $\tau_E \frac{dp_i}{dt} = -p_i(t) + r_i(t)$ , where  $\tau_E$  is the decay time constant of  
200 excitatory currents. To simulate the slow excitatory currents produced by NMDA receptors, we set  $\tau_E =$   
201 200 ms.

202 We next added recurrent connectivity between model units. Connectivity between model units is random  
203 and sparse, with  $p = 10\%$  probability of a synapse forming between any two neurons, and weights of



204 existing synapses sampled from a uniform distribution:  $W_{ij} \sim U(0, 1/\sqrt{N \cdot p})$ . We also defined a gain  
205 parameter  $g$  that scales the strength of all synapses in the network.

206 To reduce finite-size effects in this model, we modeled recurrent inhibition by a single graded input  $I_{inh}$   
207 representing an inhibitory population that receives equal input from, and provides equal input to, all  
208 excitatory units; dynamics of  $I_{inh}$  thus evolve as  $\tau_I \frac{dI_{inh}}{dt} = -I_{inh}(t) + \frac{1}{N} \sum_{n=1}^N r_N(t)$ , where  $\tau_I = 50$  ms  
209 is the decay time constant of inhibitory currents.

210 Each modeled “stimulus” input to the network was modeled with the same dynamics, with a high initial  
211 firing rate that decayed to a much lower sustained firing rate, and dropped to zero ten seconds after  
212 stimulus onset: specifically, in our model this input took the form  $s(t) = \mathbb{I}(t < 10) \int_{-\infty}^t \mathbb{I}(0 < t' <$   
213  $2)e^{-\frac{t-t'}{2}} dt'$  where  $\mathbb{I}$  is the indicator function. Each stimulus drove a random 50% of excitatory units in the  
214 network with input strength  $w_i \sim g \cdot U(0, 1)$ .

215 Thus, outside of spiking events, the membrane potential of neuron  $i$  evolves as  $\tau_m \frac{dx_i}{dt} = -x_i(t) +$   
216  $g \left( \sum_{j=1}^N J_{ij} p_j(t) - g_{inh} I_{inh}(t) \right) + w_i s(t)$ . Model dynamics were simulated in discrete time using first-  
217 order Euler’s method with a timestep of  $dt = 1$  ms; a small Gaussian noise term  $\eta_i \sim \mathcal{N}(0, 1)/5$  was added  
218 at each timestep. We explored model dynamics over a range of values of  $g$  and  $g_{inh}$ , by selecting a value  
219 of  $g$  and performing a grid search over  $g_{inh}$  until the desired degree of persistence was achieved. Figures  
220 in the paper correspond to  $g = 1, g_{inh} = 3.8$ .

221 **Spiking recurrent neural network model + peptidergic excitation (pRNN).** In experimenting with the  
222 RNN+NMDA model described above, we found that we could achieve diverse temporal dynamics of  
223 spiking neurons if the time constant of excitation ( $\tau_E$ ) was further increased, causing excitation to be much  
224 slower than inhibition. This allows model neurons to act as leaky integrators of their excitatory inputs,  
225 and start spiking when the population average activity (reflected by inhibitory input) drops below the  
226 integrated excitation. Because VMHdm<sup>SF1</sup> neurons are known to express both glutamate and a variety of  
227 neuropeptides + neuropeptide receptors, we further modified the model by replacing the excitatory  
228 current with a mix of fast (glutamatergic) and slow (peptidergic) excitatory neurotransmission, although  
229 similar results are obtained in a model with just the slow component of excitatory neurotransmission.

230 We modeled fast excitatory currents as in the prior model, with dynamics  $\tau_{E_{fast}} \frac{dp_{fast_i}}{dt} = -p_{fast_i}(t) +$   
231  $r_i(t)$ , however we set  $\tau_{E_{fast}} = 50$  ms to better match the decay time constant of glutamatergic excitation.  
232 To model slow peptidergic excitation, we assumed that when a neuron spiked, peptide release was  
233 contingent on the recent firing rate history of that neuron, with peptide release only occurring if the  
234 average number of spikes in the last second exceeded a threshold  $T$  (typically  $T = 20$ , although  
235 performance was not strongly dependent on this parameter.) That is, the spiking of neuron  $i$  evoked  
236 peptide release if  $\int_{t-1}^t r_i(\tau) d\tau > T$ . Dynamics of peptide-mediated excitation were otherwise modeled as  
237 before, thus giving  $\tau_{E_{slow}} \frac{dp_{slow_i}}{dt} = -p_{slow_i}(t) + r_i(t) \cdot \mathbb{I} \left( \int_{t-1}^t r_i(\tau) d\tau > T \right)$ , where  $\mathbb{I}$  is the indicator  
238 function. We used  $\tau_{E_{slow}} = 6$  sec for all versions of the pRNN except for the third (black traces in Fig 4),  
239 for which  $\tau_{E_{slow}} = 20$  sec ( $\tau_{E_{slow}}$  is abbreviated as  $\tau_S$  in Fig 4).

240 For simplicity we assumed the synaptic weight matrix  $J$  was the same for both fast and slow components  
241 of excitation. Membrane potential dynamics in this model are therefore given by  $\tau_m \frac{dx_i}{dt} = -x_i +$   
242  $g \sum_{j=1}^N J_{ij} p_{fast_j}(t) + g \sum_{j=1}^N J_{ij} p_{slow_j}(t) - g_{inh} I_{inh}(t) + w_i s(t)$ . We present three versions of this  
243 model in **Fig 4**: in the “low gain” model,  $g = 1, g_{inh} = 8.8, \tau_{E_{slow}} = 6$  sec; in the “high gain” model,  $g =$   
244  $6, g_{inh} = 7.8, \tau_{E_{slow}} = 6$  sec; in the “high  $\tau_S$ ” model,  $g = 2.5, g_{inh} = 4.25, \tau_{E_{slow}} = 20$  sec. Simulation  
245 was performed as for the NMDA-RNN model, and as above parameters were fit by fixing the value of  $g$   
246 (and  $\tau_{E_{slow}}$ ) and performing a grid search over values of  $g_{inh}$  to achieve the desired degree of persistence.

247 **PRNN + local connectivity.** The locally connected version of the pRNN model was created by adding a  
248 “distance dependence” on the probability of a pair of neurons forming a synaptic connection. Model  
249 neurons were numbered between 1 and  $N$ , and for neurons  $i$  and  $j$  the probability of forming a synapse  
250 was defined as  $p_{ij} = p_0 e^{-(i-j)^2/\sigma}$ , where  $p_0 = 0.1$  is the baseline degree of connectivity in the network,  
251 and  $\sigma$  sets the rate at which connectivity falls off with distance (here distance is defined as  $|i - j|$ ). We  
252 found that broad connectivity was necessary to match the stimulus representation overlap seen in the  
253 data; plots in **Fig 4** and the illustration of distance-dependent connectivity in **ED Fig 9a-b** were constructed  
254 using  $\sigma = 0.7N$ .

255 As in the pRNN, each stimulus in the local connectivity model provided input to 50% of model neurons.  
256 To match the observed Pearson’s correlation of the data, we found that it was necessary for stimulus  
257 inputs to reflect the structure of the model network, by targeting separate but still overlapping portions  
258 of the band of model neurons. Specifically, we found that the data was well fit when the middle 50% of  
259 model neurons in the band could receive input from both rat and USS stimuli, while the outermost 25%  
260 could only receive rat or USS input (see **ED Fig 9a**).

261 **Data similarity score, time-evolving dynamics.** We constructed a data similarity score to quantify the  
262 degree of similarity between the plotted curves in **Fig 4e**, thus capturing how much the time-evolving  
263 dynamics of model neurons looked like that of the data. For each model and each mouse, we computed  
264 the Mean Correlation as defined above, which we will call  $MC_{model}(t)$  for a given model and  $MC_{mouse\ i}(t)$   
265 for a given mouse. MC is a function of time-- thus to quantify the mean similarity between the data and a  
266 given model over time, we considered the value of  $MC_{model}(t)$  and  $MC_{mouse\ i}(t)$  for all imaging frames  
267 (acquired at 11Hz) from 0 to 45 seconds relative to stimulus onset, which we reference using a frame  
268 index  $t = 1 \dots T$  (so  $t=1$  corresponds to a time of 0sec and  $t=T$  corresponds to a time of 45sec). Given these  
269 definitions, we define the data similarity score of the model dynamics as:

270 Similarity Score<sub>dynamics</sub>

$$271 = \frac{1}{N} \sum_{i=1}^N 1 - \left( \sum_{t=1}^T |MC_{mouse\ i}(t) - MC_{model}(t)| \right) / \left( \sum_{t=1}^T |MC_{mouse\ i}(t)| \right)$$

272 This can be simply interpreted as akin to the area between the data/model curves for each plot in **Fig 4e**.  
273 Note that the MC for the data here was computed from the USS-evoked neural activity, however MC for  
274 other stimuli gave similar results, as we found little difference between the MC for different stimuli.

275 **Data similarity score, stimulus specificity.** This data similarity score quantifies the degree of similarity  
276 between the plotted curves in **Fig 4h**, ie how much the Pearson’s correlation between rat- and USS-evoked  
277 activity in each model looked like that observed in the data. We computed the Pearson’s correlation (as  
278 defined above) for each model and each mouse, which we call  $PC_{model}(t)$  for a given model and

279  $PC_{\text{mouse } i}(t)$  for a given mouse. We define frames  $t=1\dots T$  as all imaging frames from times 0 to 45 seconds  
280 relative to stimulus onset (same as for the similarity score of dynamics). We then define the data similarity  
281 score of model stimulus-specific activity as:

$$\text{Similarity Score}_{\text{specificity}} = \frac{1}{N} \sum_{i=1}^N 1 - \frac{1}{T} \left( \sum_{t=1}^T |PC_{\text{mouse } i}(t) - PC_{\text{model}}(t)| \right)$$

283 Like the similarity score of the dynamics, this can be interpreted as the area between the data/model  
284 curves for each plot in **Fig 4h**.

- 285 1 Dhillon, H. *et al.* Leptin directly activates SF1 neurons in the VMH, and this action by leptin is  
286 required for normal body-weight homeostasis. *Neuron* **49**, 191-203,  
287 doi:10.1016/j.neuron.2005.12.021 (2006).
- 288 2 Kunwar, P. S. *et al.* Ventromedial hypothalamic neurons control a defensive emotion state. *Elife*  
289 **4**, doi:10.7554/eLife.06633 (2015).
- 290 3 Remedios, R. *et al.* Social behaviour shapes hypothalamic neural ensemble representations of  
291 conspecific sex. *Nature* **550**, 388-392, doi:10.1038/nature23885 (2017).
- 292 4 Mongeau, R., Miller, G. A., Chiang, E. & Anderson, D. J. Neural correlates of competing fear  
293 behaviors evoked by an innately aversive stimulus. *J Neurosci* **23**, 3855-3868 (2003).
- 294 5 Lerner, T. N. *et al.* Intact-Brain Analyses Reveal Distinct Information Carried by SNc Dopamine  
295 Subcircuits. *Cell* **162**, 635-647, doi:10.1016/j.cell.2015.07.014 (2015).
- 296 6 Zhou, P. *et al.* Efficient and accurate extraction of in vivo calcium signals from microendoscopic  
297 video data. *Elife* **7**, doi:10.7554/eLife.28728 (2018).
- 298 7 Pnevmatikakis, E. A. *et al.* Simultaneous Denoising, Deconvolution, and Demixing of Calcium  
299 Imaging Data. *Neuron* **89**, 285-299, doi:10.1016/j.neuron.2015.11.037 (2016).
- 300 8 Chen, T. W. *et al.* Ultrasensitive fluorescent proteins for imaging neuronal activity. *Nature* **499**,  
301 295-300, doi:10.1038/nature12354 (2013).
- 302 9 Dana, H. *et al.* Thy1-GCaMP6 transgenic mice for neuronal population imaging in vivo. *PLoS One*  
303 **9**, e108697, doi:10.1371/journal.pone.0108697 (2014).

304

305



**Table 1: Statistical significance testing**

All t-tests are two-sided unless otherwise stated. All tests from distinct samples unless otherwise stated.

| Figure                | Panel | Identifier                            | Sample size                          | p-value          | Statistical test                 | Notes                            |
|-----------------------|-------|---------------------------------------|--------------------------------------|------------------|----------------------------------|----------------------------------|
| 1                     | e     | rat vs toy                            | 4 mice                               | 0.0078           | paired t-test                    |                                  |
|                       | g     | rat vs mouse                          | 8 mice                               | 0.0001           | paired t-test                    |                                  |
|                       |       | rat vs toy                            | 8 mice                               | 0.0005           | paired t-test                    |                                  |
|                       |       | mouse vs toy                          | 8 mice                               | 0.0015           | paired t-test                    |                                  |
|                       | h     | rat vs mouse - headfixed              | 4 mice home cage, 8 mice head fixed  | 0.0052           | paired t-test                    |                                  |
|                       | i     | rat vs mouse - headfixed              | 4 mice home cage, 8 mice head fixed  | 0.0110           | paired t-test                    |                                  |
|                       | k     | rat control vs rat iC++               | 7 mice control, 7 mice iC++          | 0.0289           | t-test                           |                                  |
|                       | m     | during+after vs control               | 12 mice control, 6 mice during+after | 0.0078           | rep. meas. ANOVA                 | covariates tested: group vs time |
|                       |       | after only vs control                 | 12 mice control, 6 mice after-only   | 0.0321           | rep. meas. ANOVA                 | covariates tested: group vs time |
|                       | n     | control before vs after rat           | 12 mice                              | 0.0006           | paired t-test                    |                                  |
|                       |       | control before rat vs after PS off    | 12 mice                              | 0.0074           | paired t-test                    |                                  |
|                       |       | after rat, control vs during+after    | 12 mice control, 6 mice during+after | 0.0023           | t-test                           |                                  |
|                       |       | after PS off, control vs during+after | 12 mice control, 6 mice during+after | 0.0223           | t-test                           |                                  |
|                       |       | after PS off, control vs after only   | 12 mice control, 6 mice after-only   | 0.0062           | t-test                           |                                  |
|                       | o     | control vs during+after               | 12 mice control, 6 mice during+after | 0.0003           | rep. meas. ANOVA                 | covariates tested: group vs time |
| control vs after only |       | 12 mice control, 6 mice after-only    | 0.0044                               | rep. meas. ANOVA | covariates tested: group vs time |                                  |
| 2                     | d     | *                                     | 5 mice                               | 0.0117           | paired t-test                    |                                  |

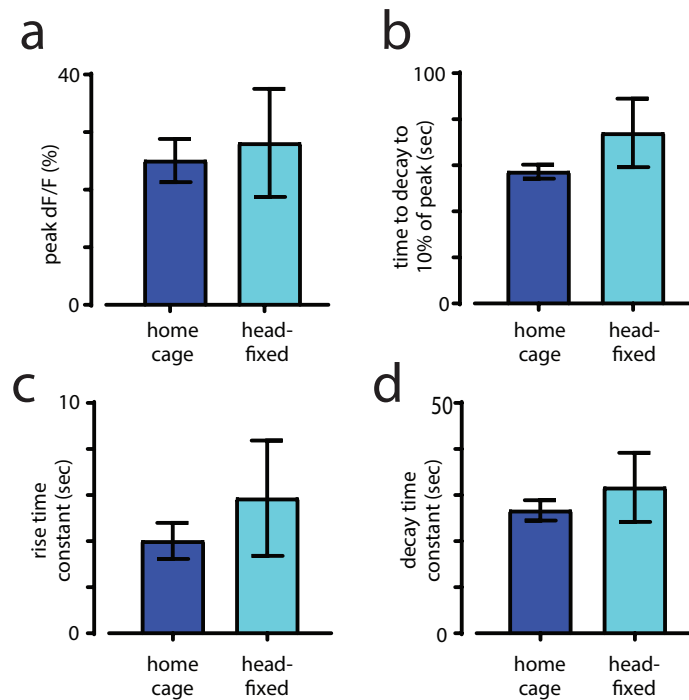

**Extended Data 1. Comparison of SF1+ neurons' response to rat in mouse home cage and head-fixed set-up.**

**a**, Peak  $\Delta F/F$  activity in response to rat in home cage and a head-fixed set-up. (home cage group  $n = 4$ ; head-fixed group  $n = 8$ ). **b**, Response time measured at 10% of peak. **c**, Rise time constant measured as time elapsed to reach  $1/e$  of peak amplitude. **d**, Decay time constant measured as time elapsed from peak to  $1/e$  of peak.

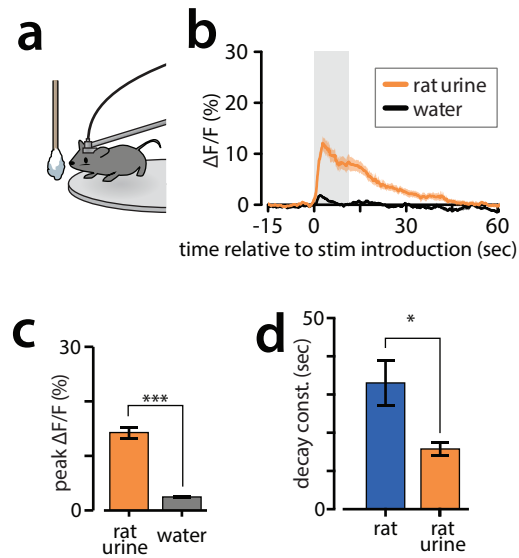

**Extended Data 2. SF1+ neurons' response to rat urine.**

**a**, Urine presentation to head-fixed fiber mouse. **b**, Averaged  $\Delta F/F$  activity traces of SF1+ neurons in response to rat urine and water.  $n = 6$ . **c**, Peak  $\Delta F/F$  activity triggered by rat urine and water. Paired t-test,  $n = 6$ . **d**, Decay time constant for rat and rat urine response,  $n = 6$ .

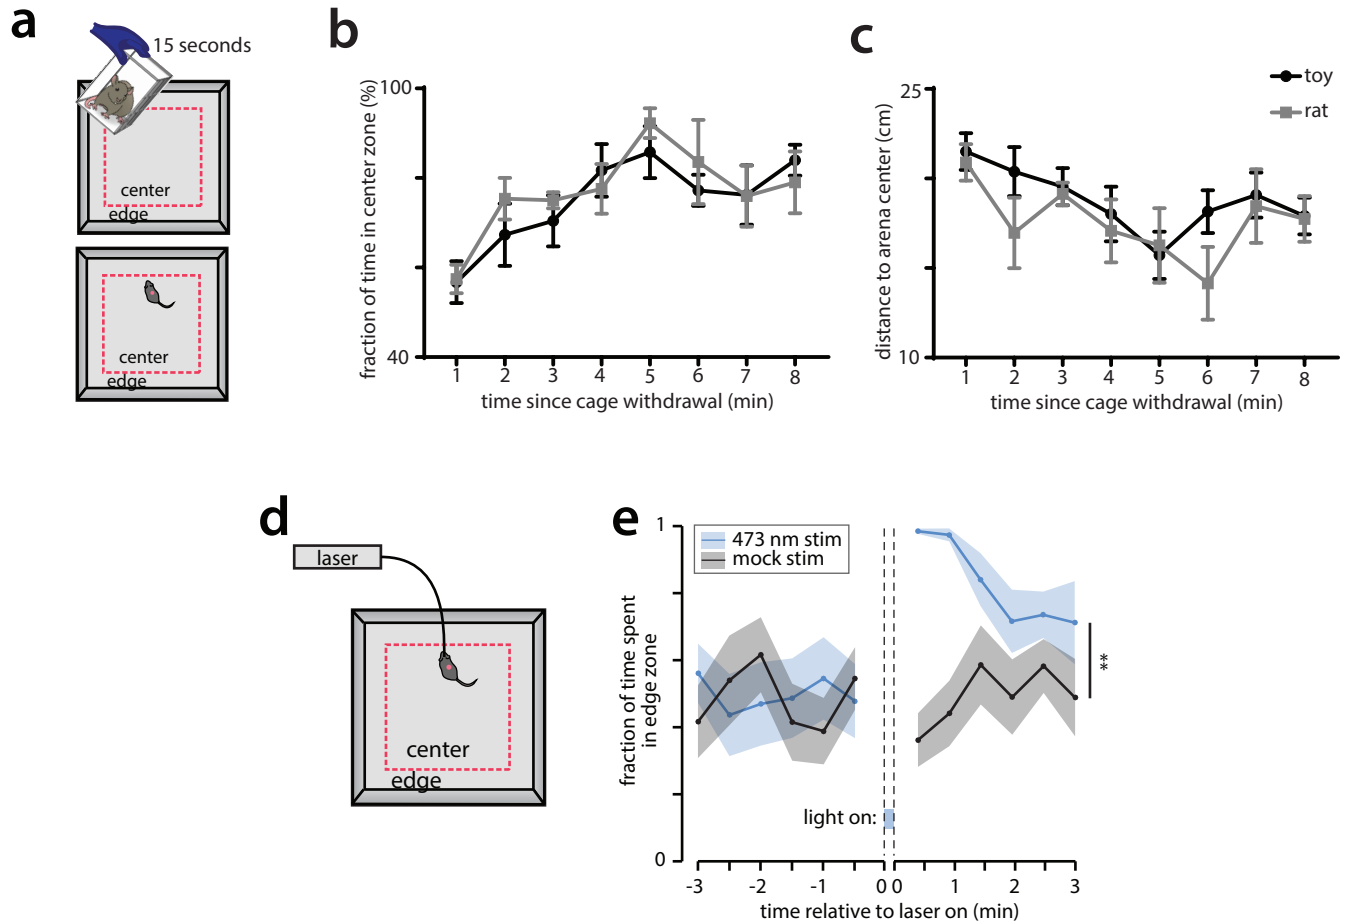

**Extended Data 3. No change in mouse behavior due to potential lingering odor from rat.**

**a**, Schematic plot showing the experiment protocol: top, a live rat or toy rat (control) was brought to the open field arena in a wire mesh cage for 15 seconds; bottom, mouse was introduced to arena afterwards immediately. **b**, Fraction of time spent in center zone (as shown by red dashed line in a) for rat group and control group, n = 6 for each group. **c**, Distance from mouse body center to arena center. **d**, Schematic plot showing the optogenetic activation experiment protocol: mice expressing Chr2 was brought to the open field arena. After a 5 minutes habituation period, a 10 seconds light or mock stimulation was delivered to the mice. **e**, Fraction of time spent in the edge zone, n= 4 mice for each group.

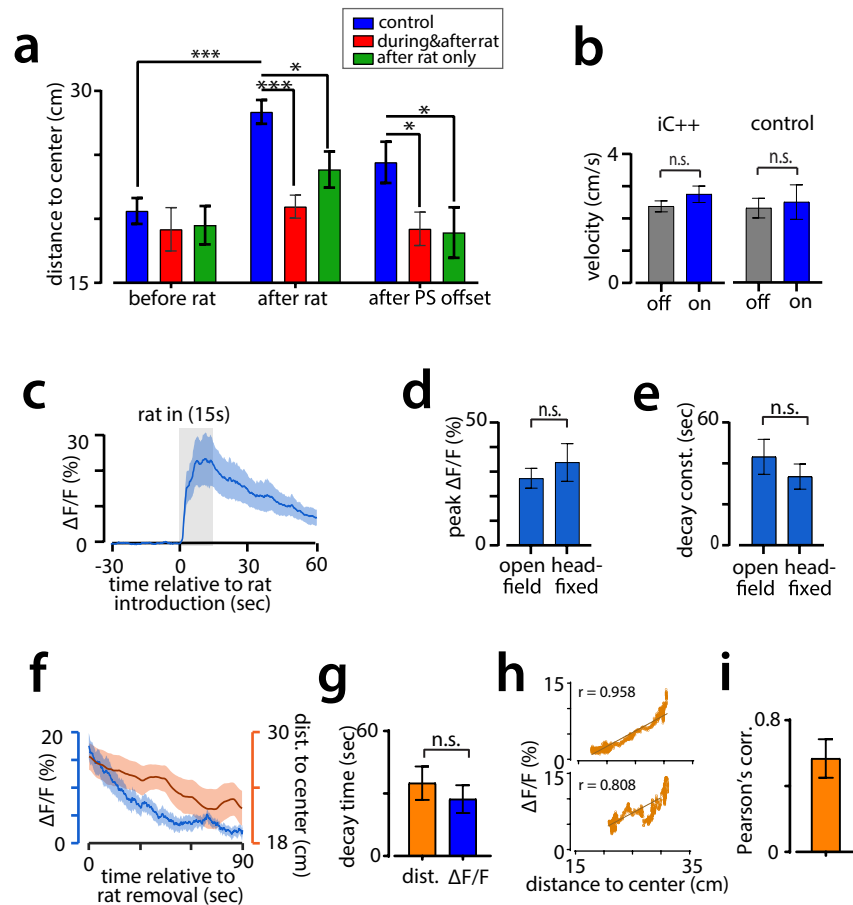

#### Extended Data 4. Fiber photometry and SF1+ neuron silencing in open field rat exposure assay.

**a**, Distance from mouse body center to arena center during three different time periods: before rat, after rat and after photo stimulation offset, corresponding to -1~0, 0~1 and 3~4 minute in Fig.1m. **b**, Mean velocity was not altered by photo stimulation for iC++ and control mice. Velocity was measured in mouse home cage and averaged during a three-minute period for light off and light on sessions. Paired t test,  $n = 12$ . **c**,  $\Delta F/F$  activity traces (mean  $\pm$  SEM) of SF1+ neurons in response to rat in open field arena. Shaded gray bar denotes the presentation of rat.  $n = 9$ . **d**, Peak  $\Delta F/F$  activity triggered by rat in open field arena ( $n = 9$ ) and head-fixed set up ( $n = 8$ ) (mean  $\pm$  SEM). **e**, Decay constants of  $\Delta F/F$  activity in open field arena and head-fixed set up. **f**, Traces (mean  $\pm$  SEM) for  $\Delta F/F$  activity and the distance from mouse body center to arena center, aligned to rat removal.  $n = 9$ . Distance to center is plotted as 30 seconds moving average. **g**, Decay time measured as the time elapsed to reach 50% of the peak for linearly fitted data.  $n = 9$ , paired t test. **h**, Scatter plot of  $\Delta F/F$  activity and the distance from mouse to arena center with a linear regression fitting for 2 example mice. Top,  $r = 0.958$ ,  $p < 0.0001$ ; bottom,  $r = 0.808$ ,  $p < 0.0001$ . **i**, Pearson's correlation coefficient between  $\Delta F/F$  activity and the distance to center.  $n = 9$ .

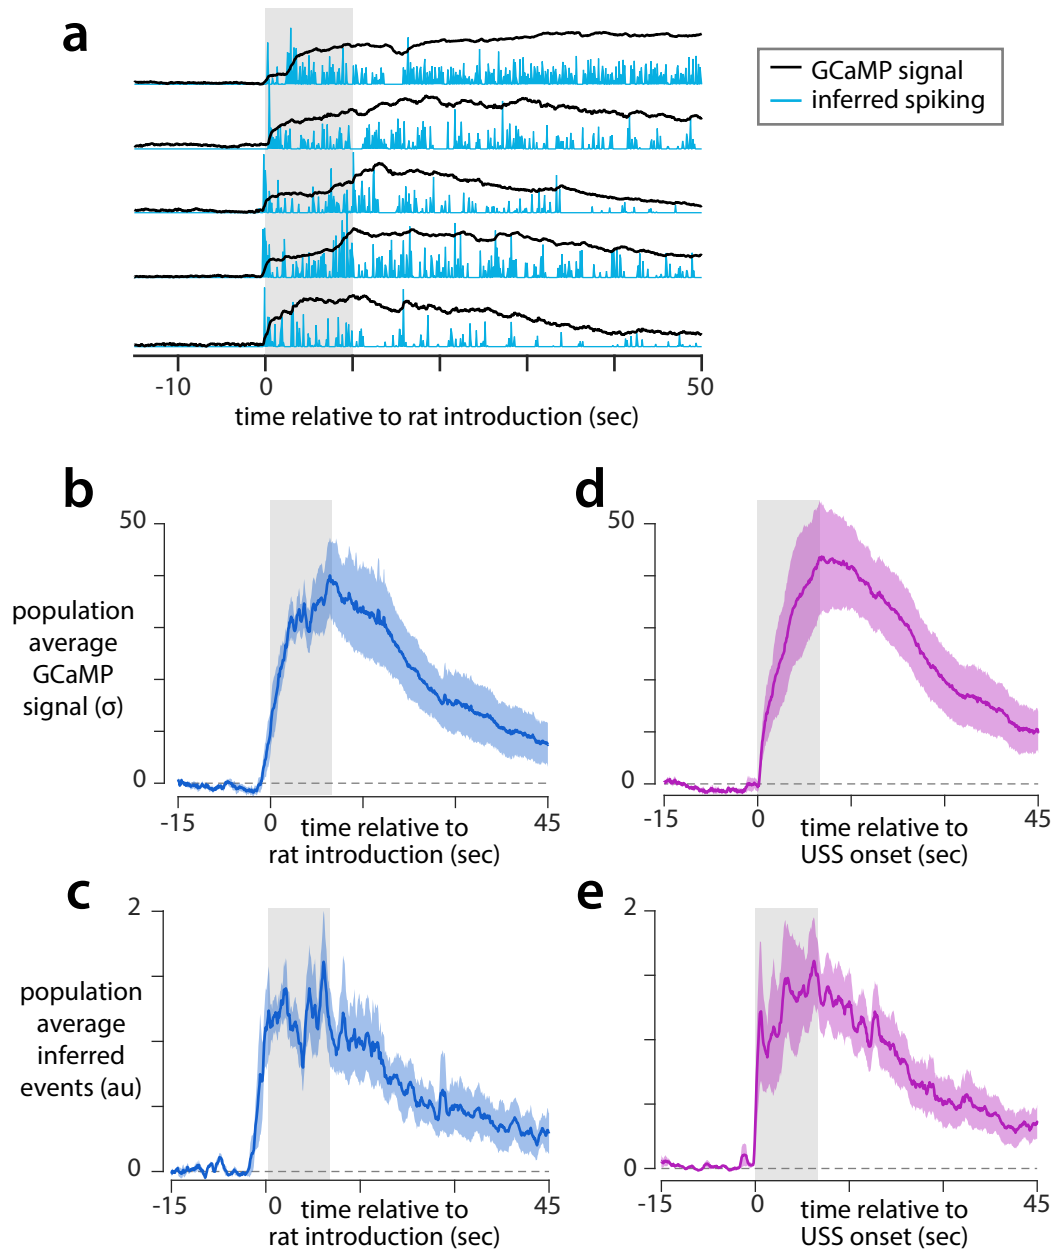

### Extended Data 5. Inferred spiking of SF1+ neurons.

**a**, Calcium traces (black) and spiking events inferred using constrained deconvolution1 (blue) for microendoscopic imaging of an example SF1+ neuron in response to five rat presentation trials in a head-fixed mouse. **b**, Response to one presentation of the rat stimulus in microendoscopic imaging experiments, averaged across cells ( $n=5$  mice, mean  $\pm$  SEM). **c**, Spiking events inferred from all individual SF1+ cells from the data in (b), averaged across cells and smoothed with a 1-second sliding window ( $n=5$  mice, mean  $\pm$  SEM). **d-e**, As in b-c, but for the USS stimulus.

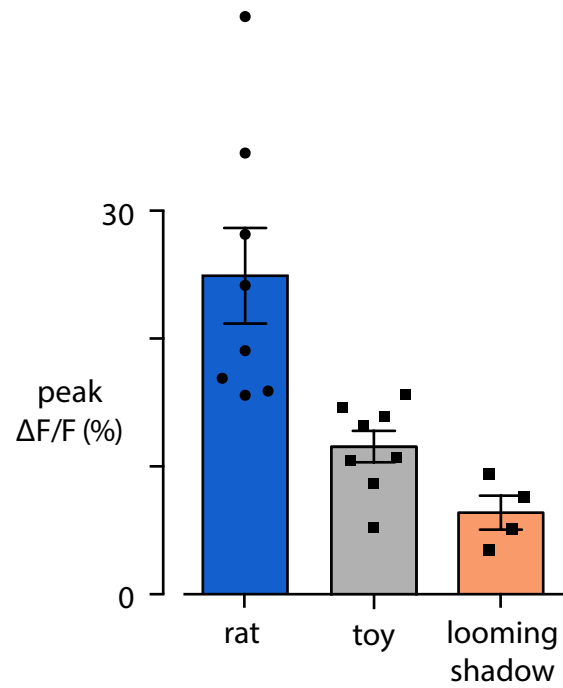

**Extended Data 6. SF1+ population shows minimal response to the looming disk stimulus.**

Peak  $\Delta F/F$  in response to rat, toy, or looming disk stimuli presented for 10 seconds in the animal's home cage (points are individual mice).

## Pearson's correlation coefficient

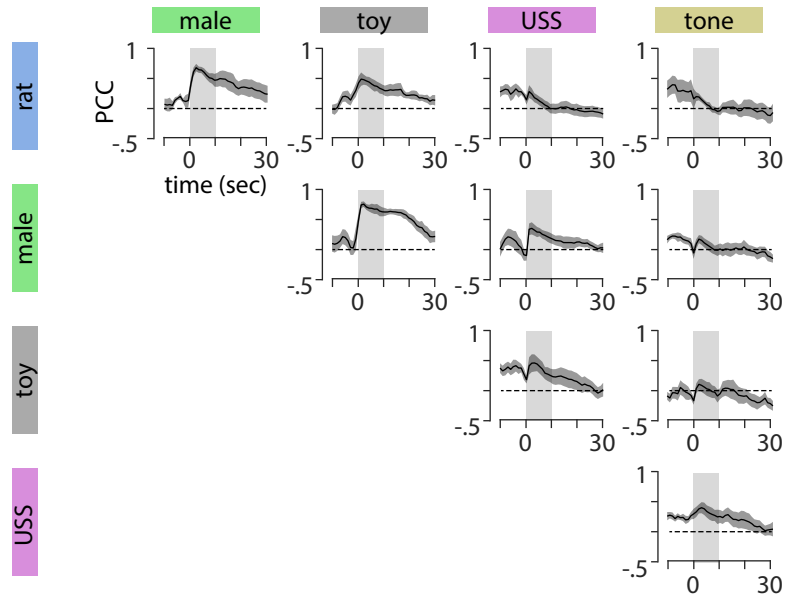

### Extended Data 7. Additional Pearson's correlations between stimulus pairs.

Pearson's correlation between SF1+ population activity evoked by all possible pairs of stimuli, as a function of time.



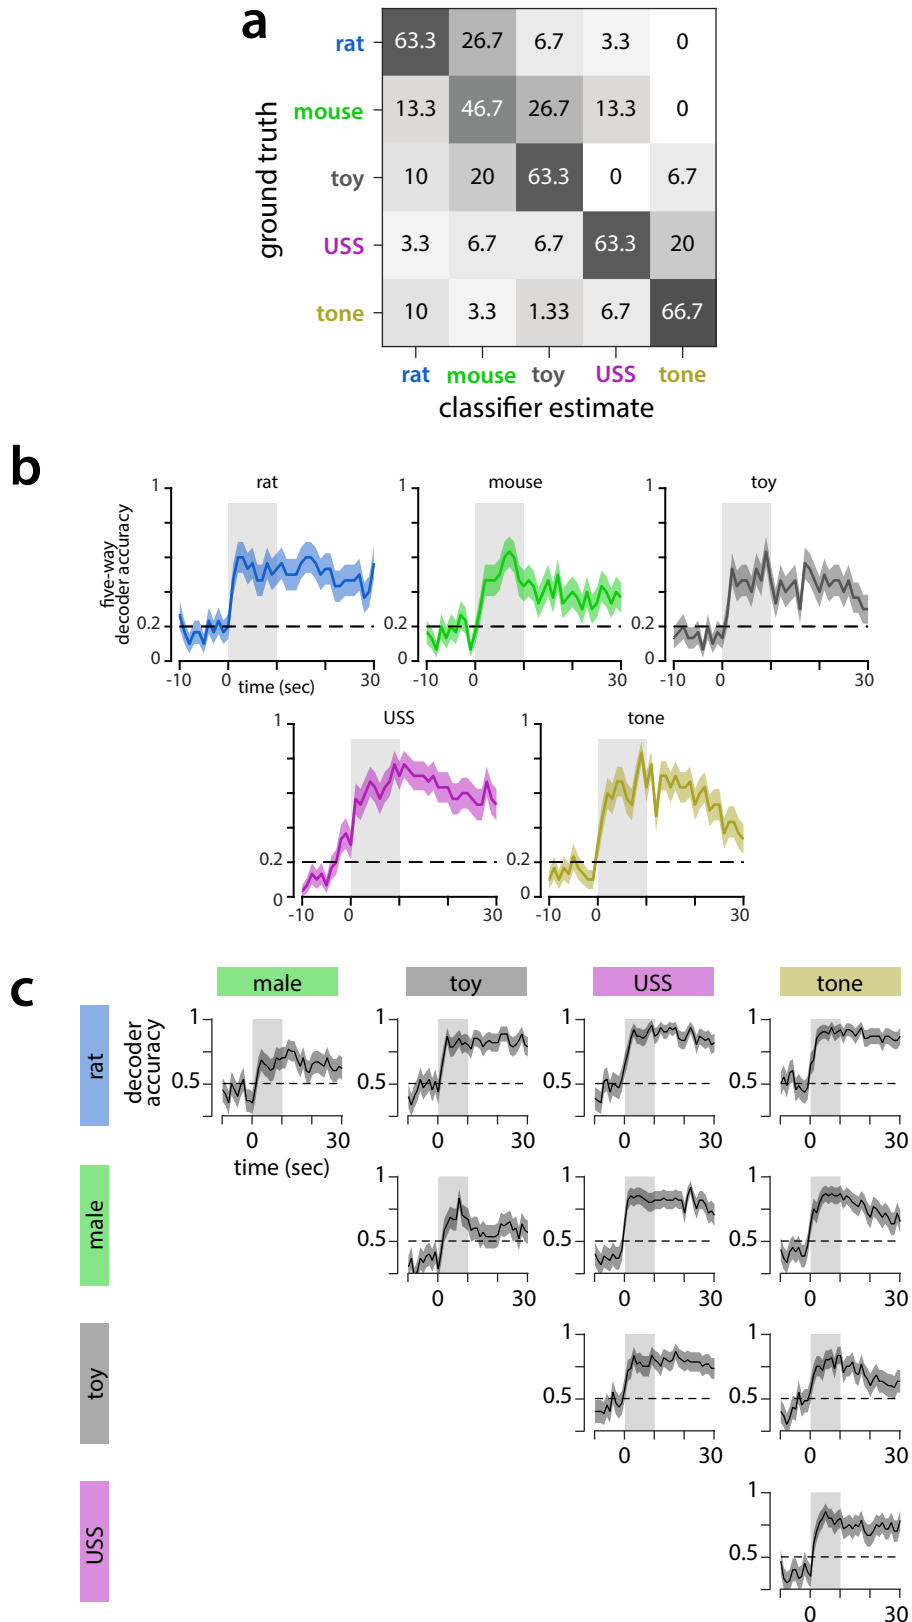

**Extended Data 8. Additional decoder analysis of SF1+ population activity.**

**a**, Confusion matrix of the five-way Naïve Bayes decoder shown in Fig 3n, showing predicted stimulus identity for each stimulus class. Matrix is normalized so rows sum to 100%. **b**, Accuracy of the time-dependent five-way Naïve Bayes decoder shown in Fig 3o, as a function of time, for each tested stimulus. **c**, Accuracy of time-dependent binary Naïve Bayes decoders trained on all possible pairs of stimuli. The pair of stimuli being decoded for each plot is specified by the labels on the left and top. All plots show mean  $\pm$  SEM across 5 imaged mice.

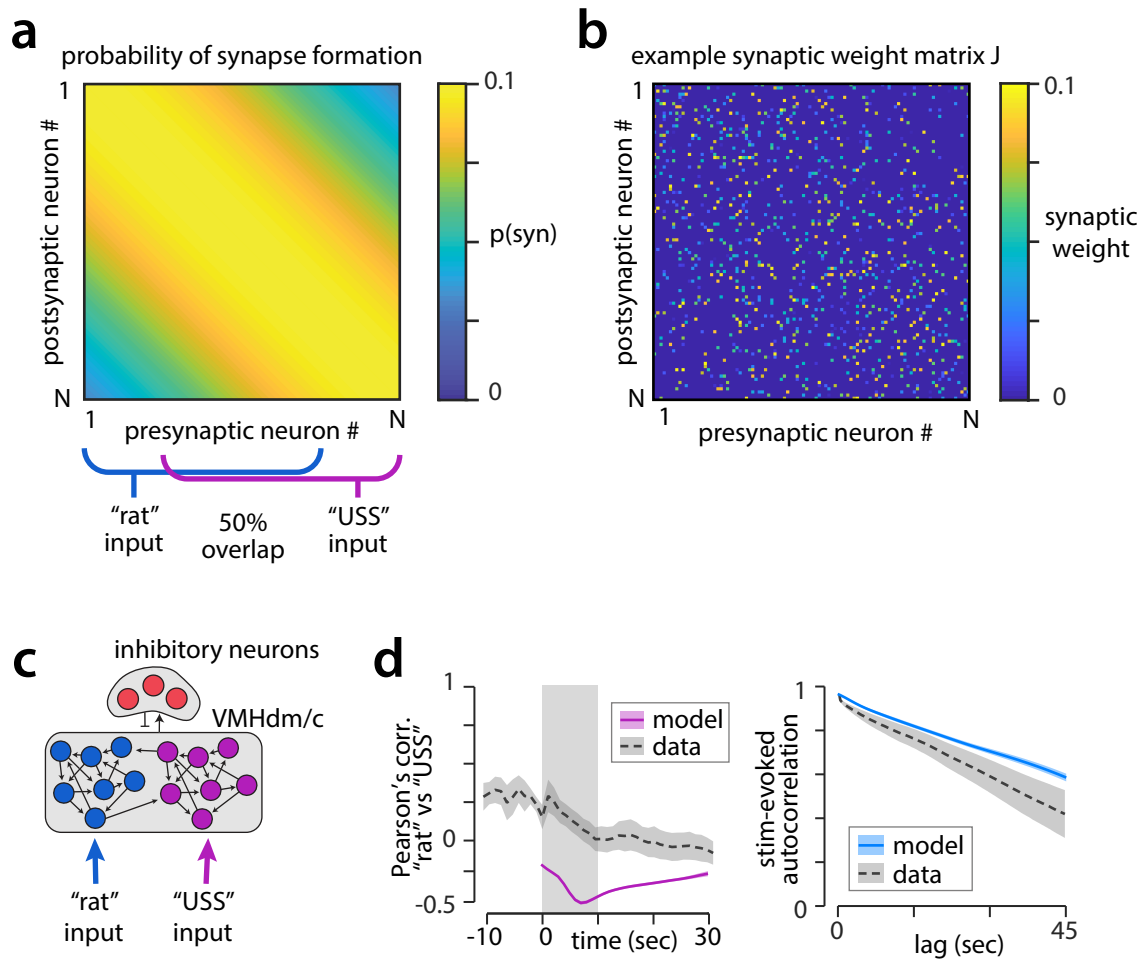

### Extended Data 9. Locally connected model networks.

**a**, Probability of synapse formation between neuron pairs decreases moderately as a function of “distance” (neuron number) in the locally connected sRNN model. Segments of the model targeted by rat and USS model input are also shown (blue/purple lines.) **b**, Example synaptic weight matrix generated from probability matrix shown in **a**; for visibility every 10th model neuron is shown. **c**, Example of a more highly structured model network, in which largely separate populations of neurons respond to the rat vs USS model inputs. **d**, Pearson’s correlation and stimulus-evoked autocorrelation for a network model such as that in (**c**), in which network structure results in no overlap between rat and USS representations.
